# Supplementary material for: Reassortment and distinct evolutionary dynamics of Rift Valley Fever virus genomic segments
Source: PubMed Central journal article supplement (PMC4477411; doi:10.1038/srep11353), 2015-06-23
Supplement: srep11353-s1.pdf [file srep11353-s1.pdf]

## Supporting information

### Reassortment and distinct evolutionary dynamics of Rift Valley Fever virus genomic segments

Caio C. M. Freire<sup>1</sup>, Atila Iamarino<sup>1</sup>, Peinda O. Ly Soumaré<sup>2</sup>, Ousmane Faye<sup>2</sup>,  
Amadou A. Sall<sup>2</sup>, Paolo M. A. Zanotto<sup>1\*</sup>

1. Laboratory of Molecular Evolution and Bioinformatics, Department of Microbiology, Biomedical Sciences Institute, University of Sao Paulo, Sao Paulo, Brazil.
2. Institut Pasteur de Dakar, Dakar, Senegal.

\*Corresponding author: Paolo M. A. Zanotto. Laboratory of Molecular Evolution and Bioinformatics, Department of Microbiology, Biomedical Sciences Institute – ICBII, University of São Paulo, Av. Prof. Lineu Prestes, 1734 São Paulo - SP - Brazil – 05508- 000. E-mail: [pzanotto@usp.br](mailto:pzanotto@usp.br). Phone: +55 1130918453. Fax: +55 1130917354.

a)

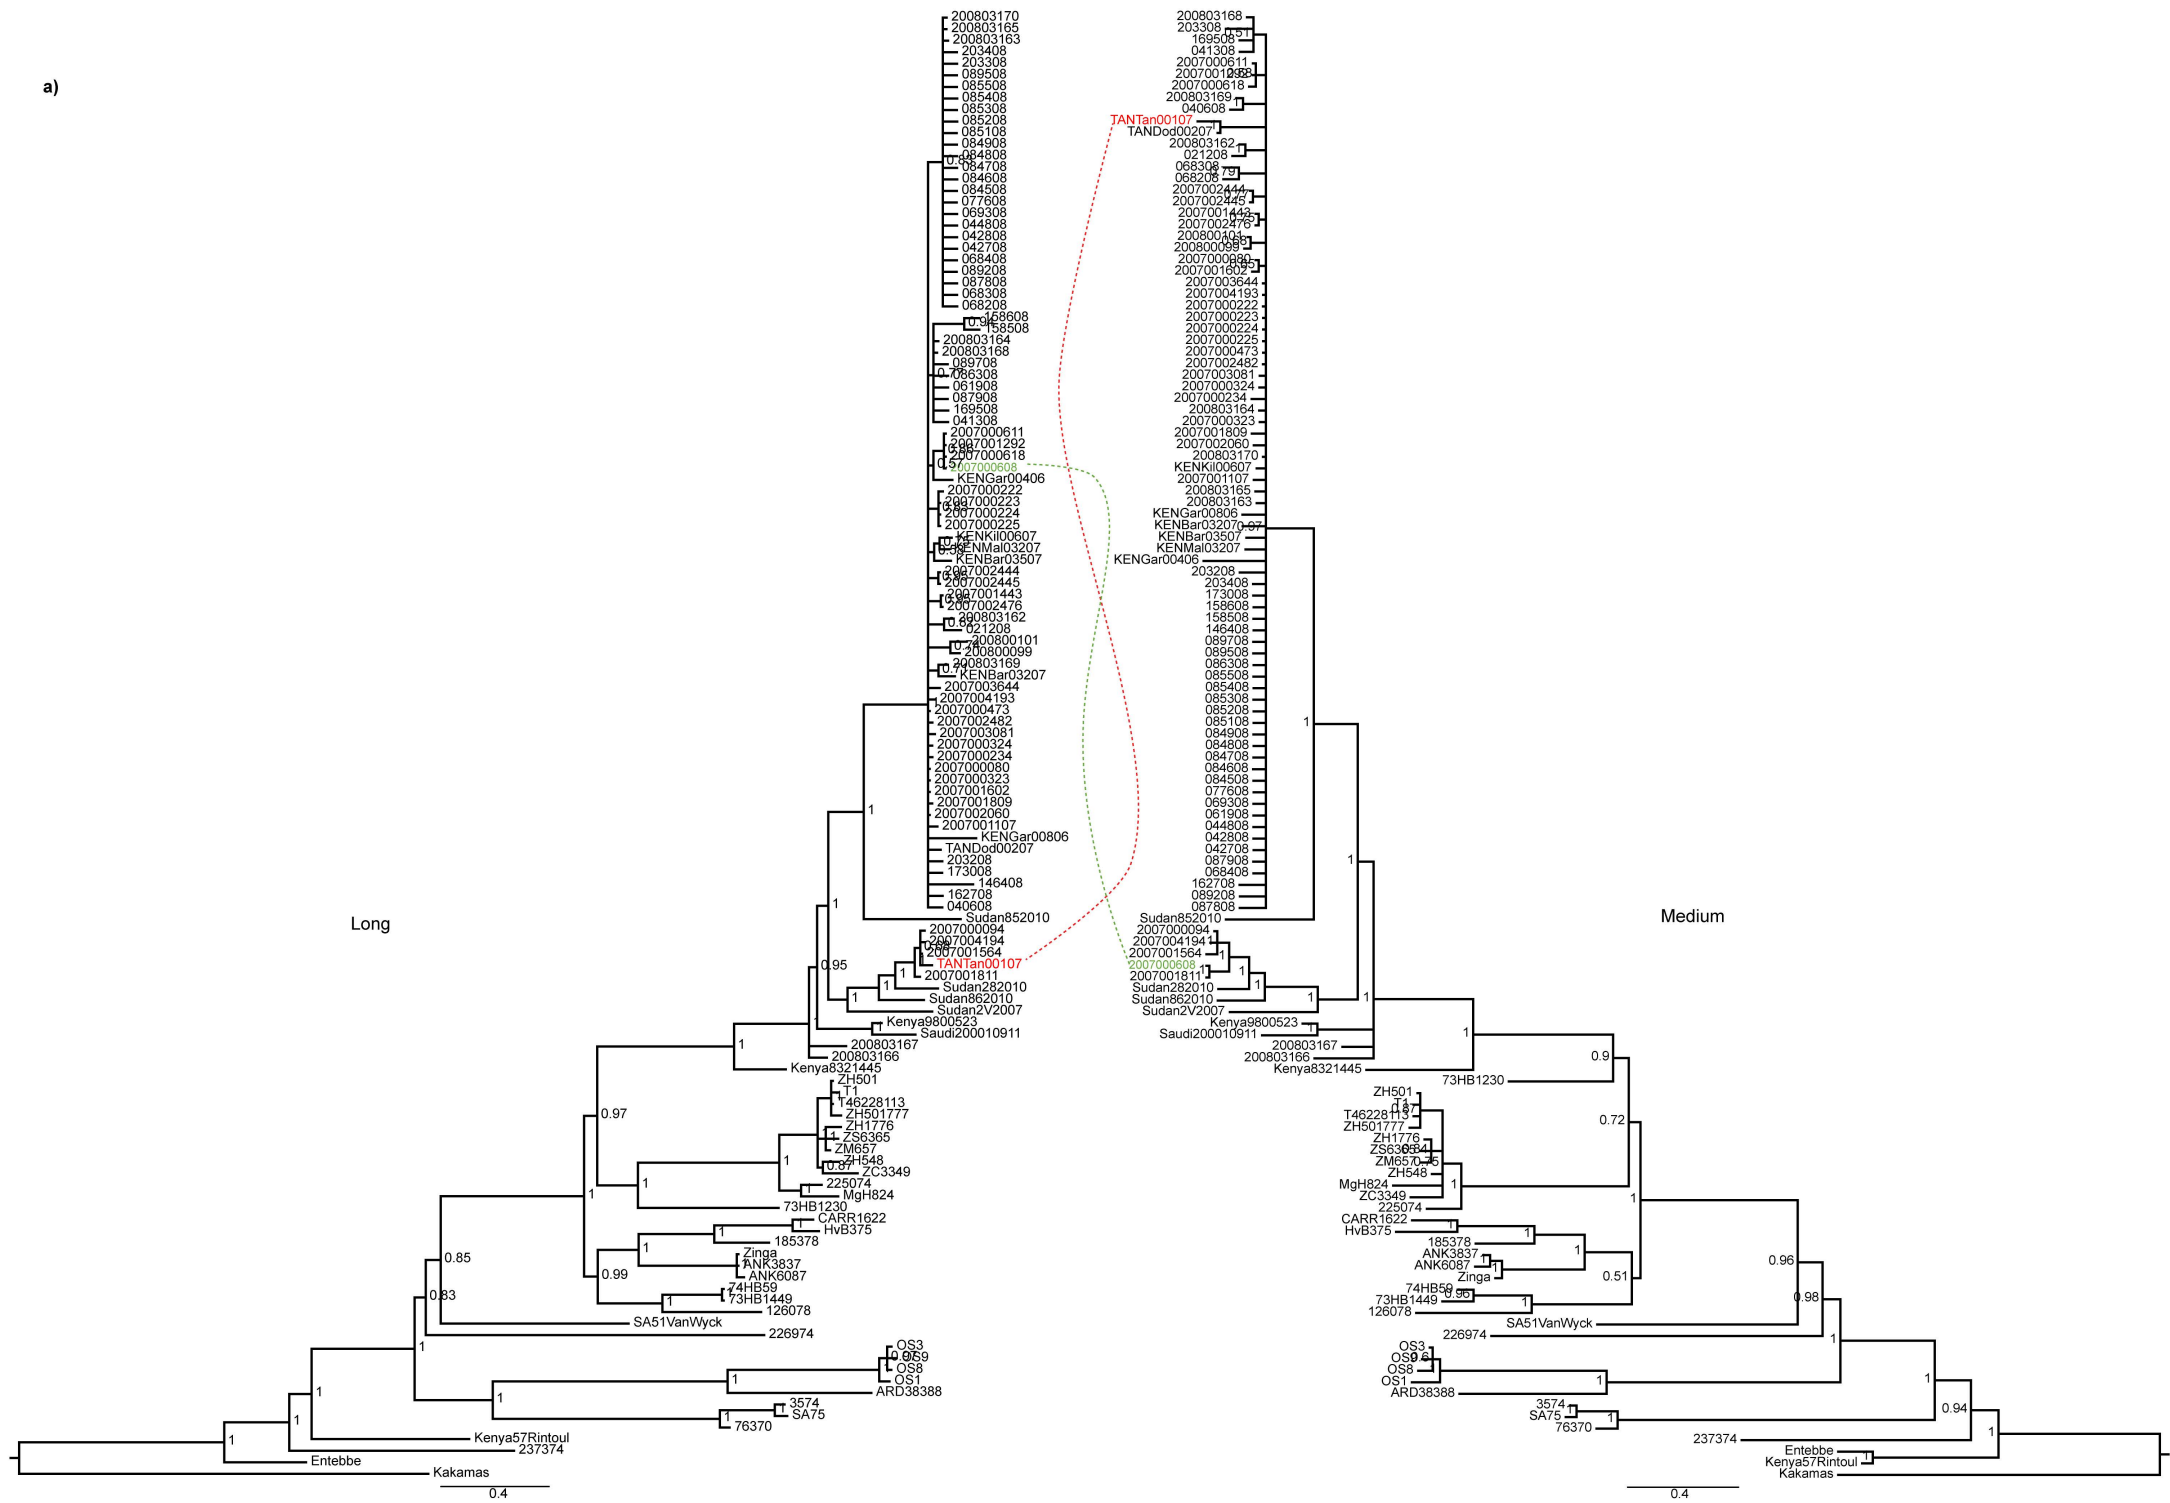

b)

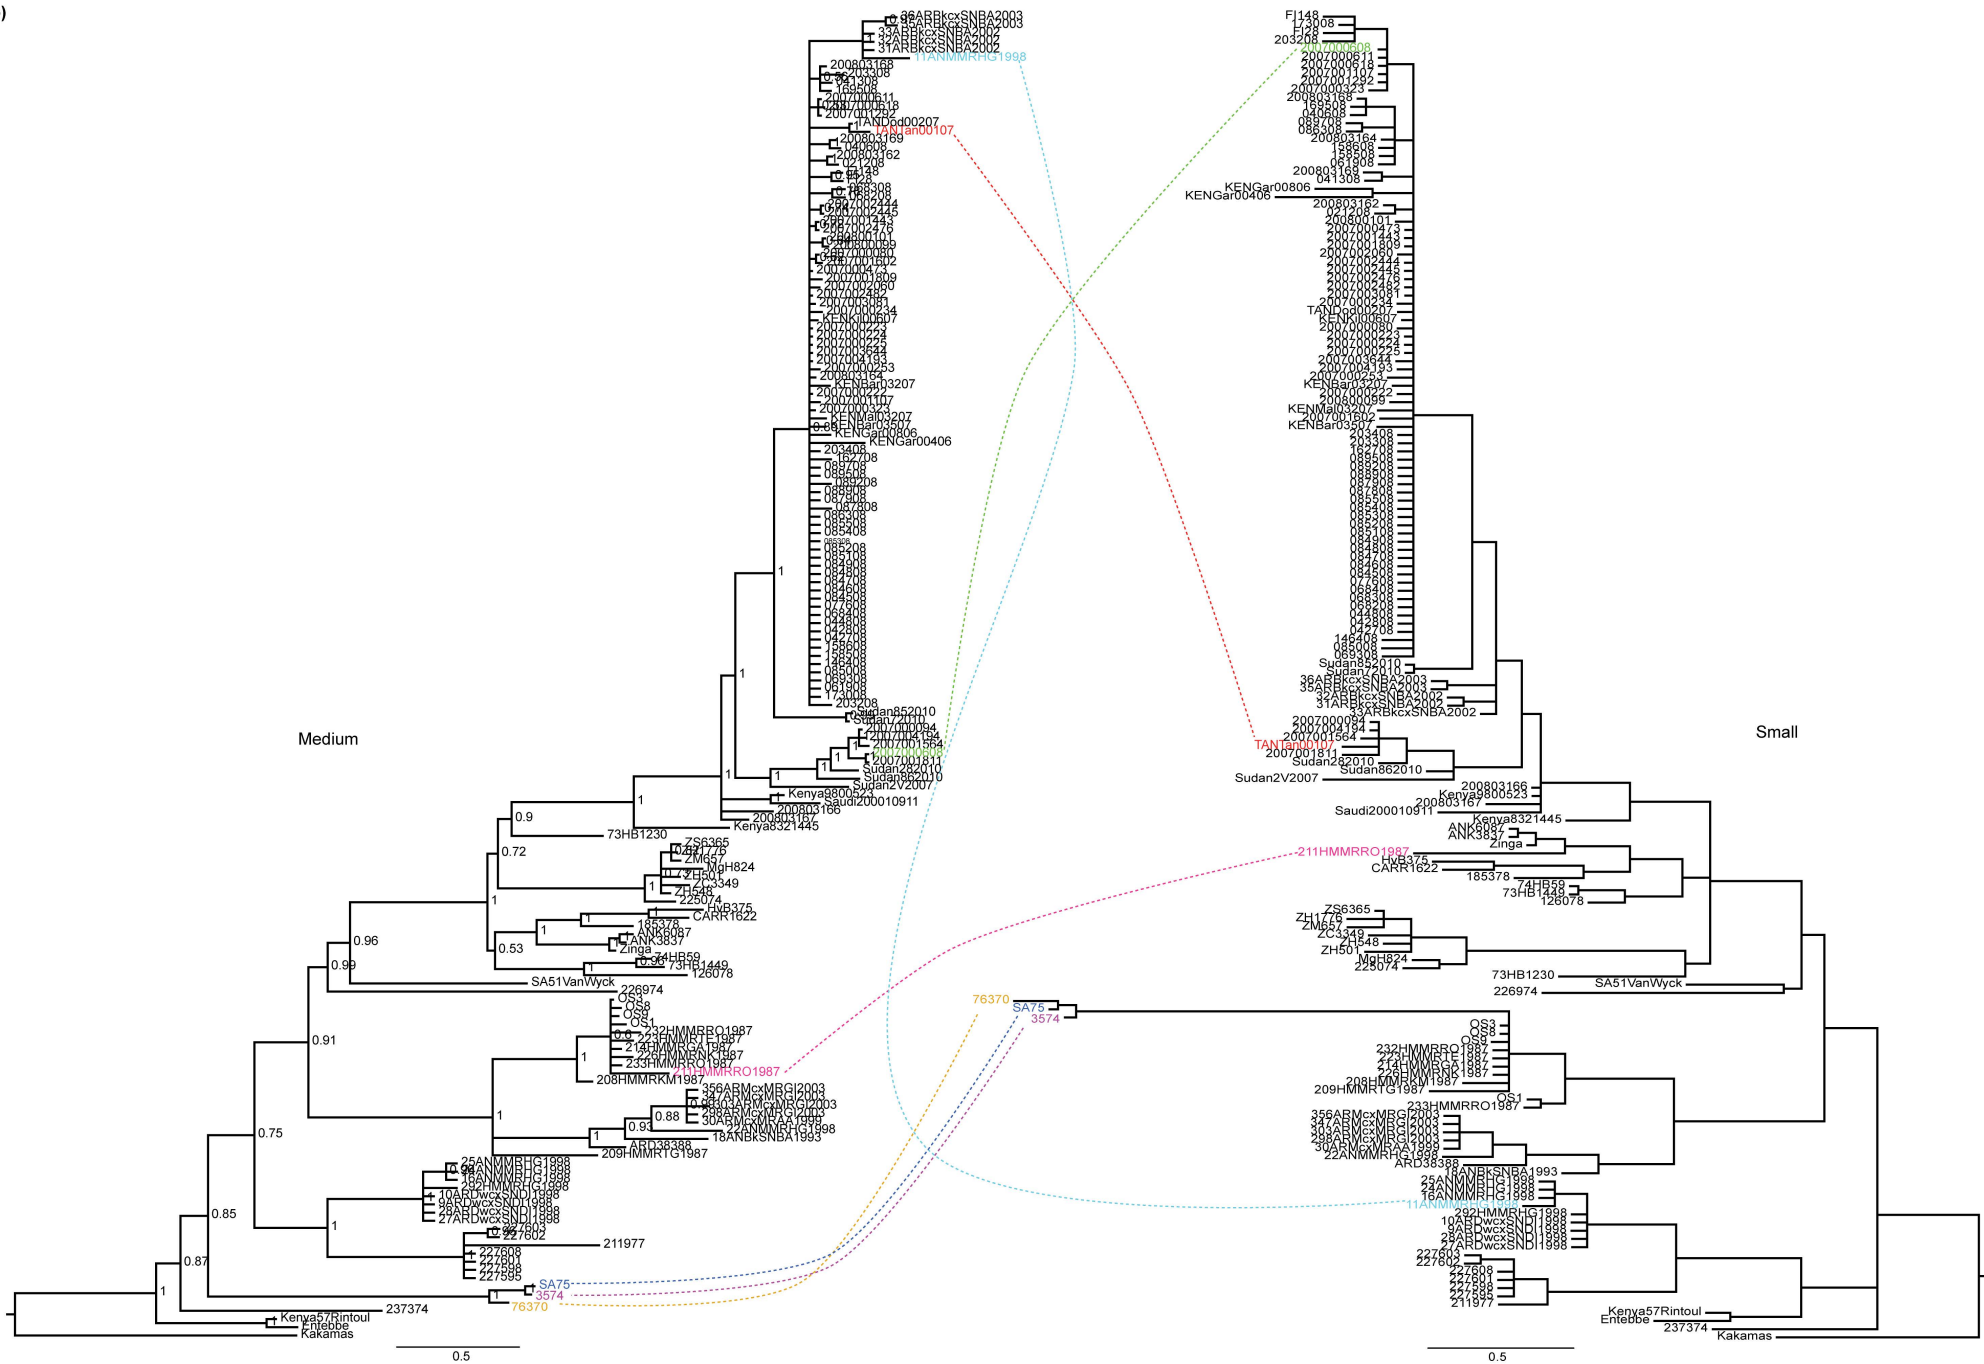

**Figure S1. Paired phylogenetic trees for RVFV segments showing phylogenetic discrepancies among reassortant lineages.** A – Phylogenetic trees for L and M. B – Phylogenetic trees for M and S. Posterior probability support values are shown close to the nodes. Pairs of reassortants are colored accordingly.

a)

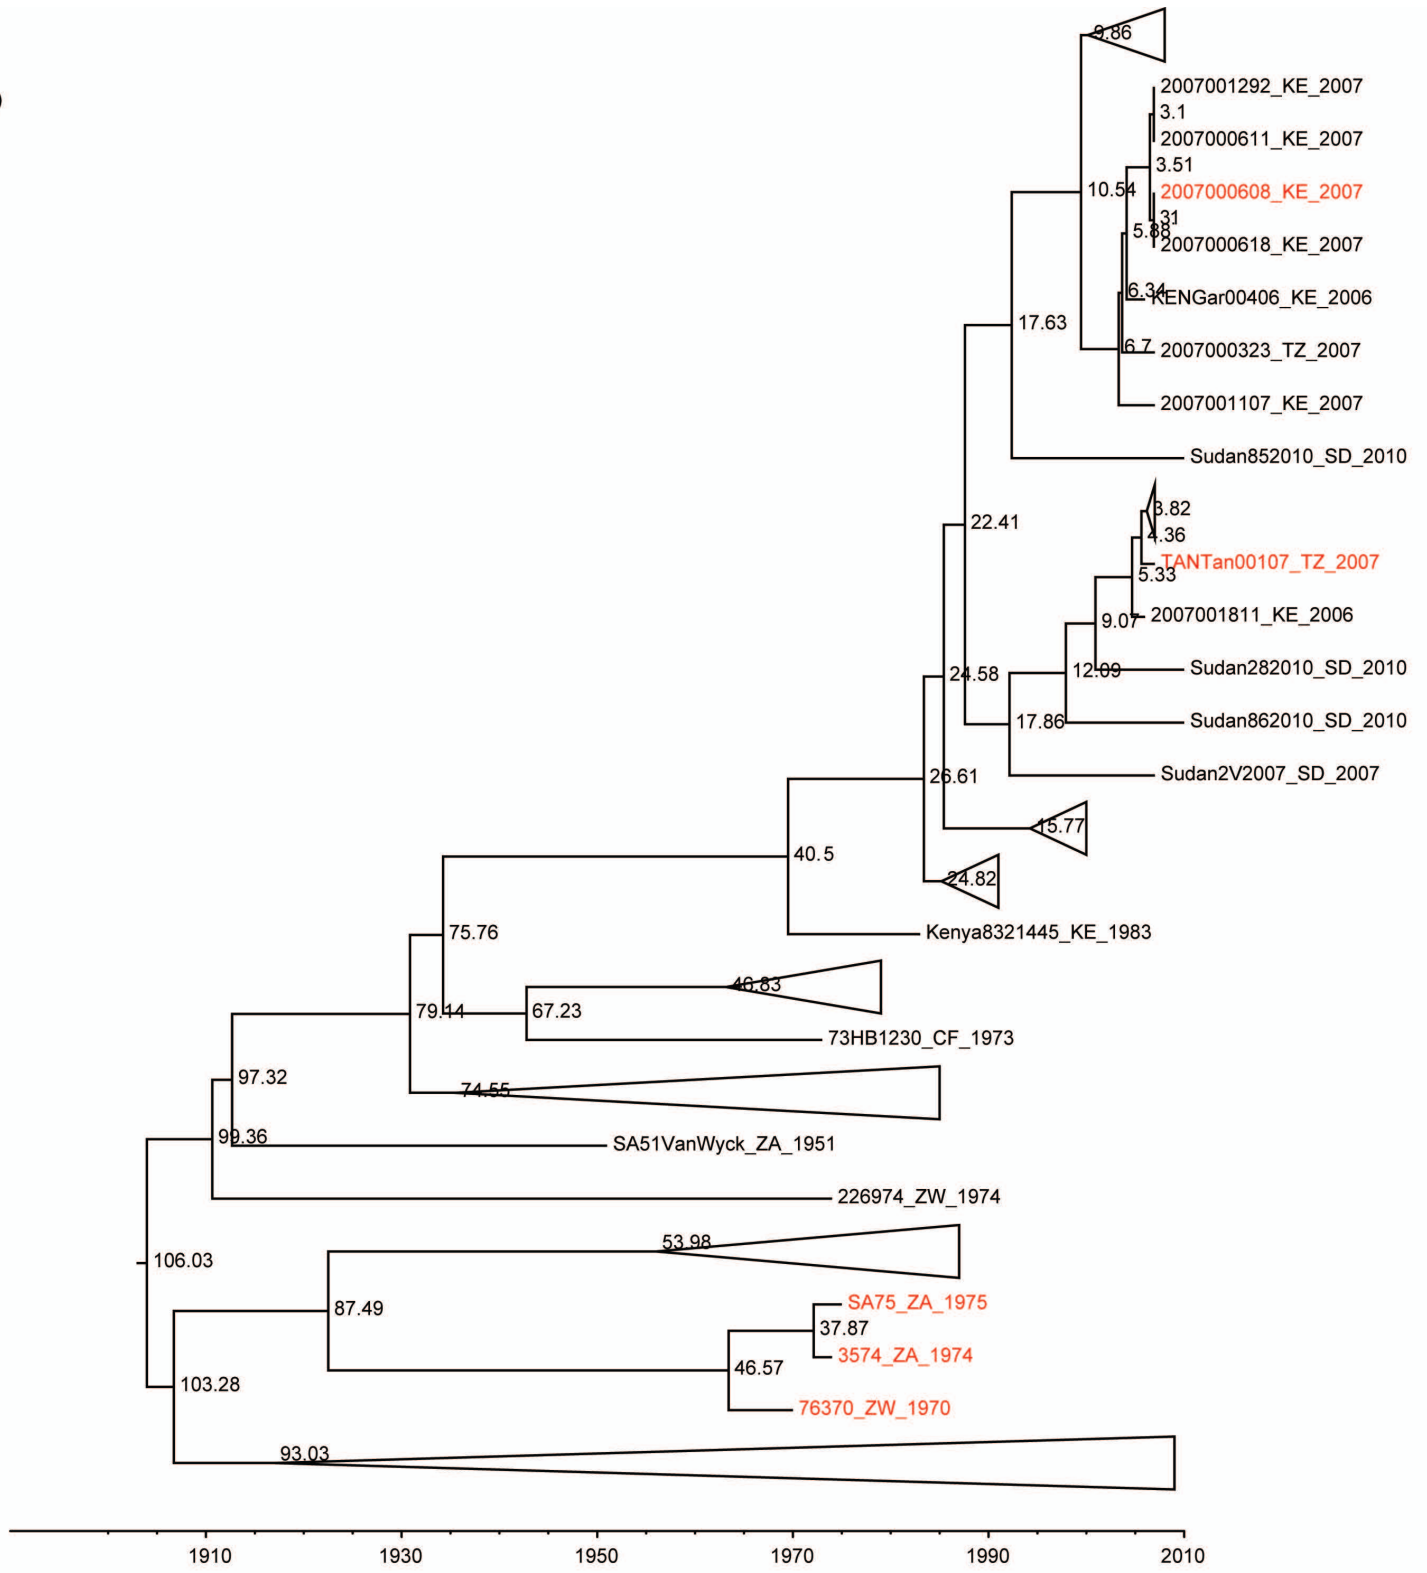

b)

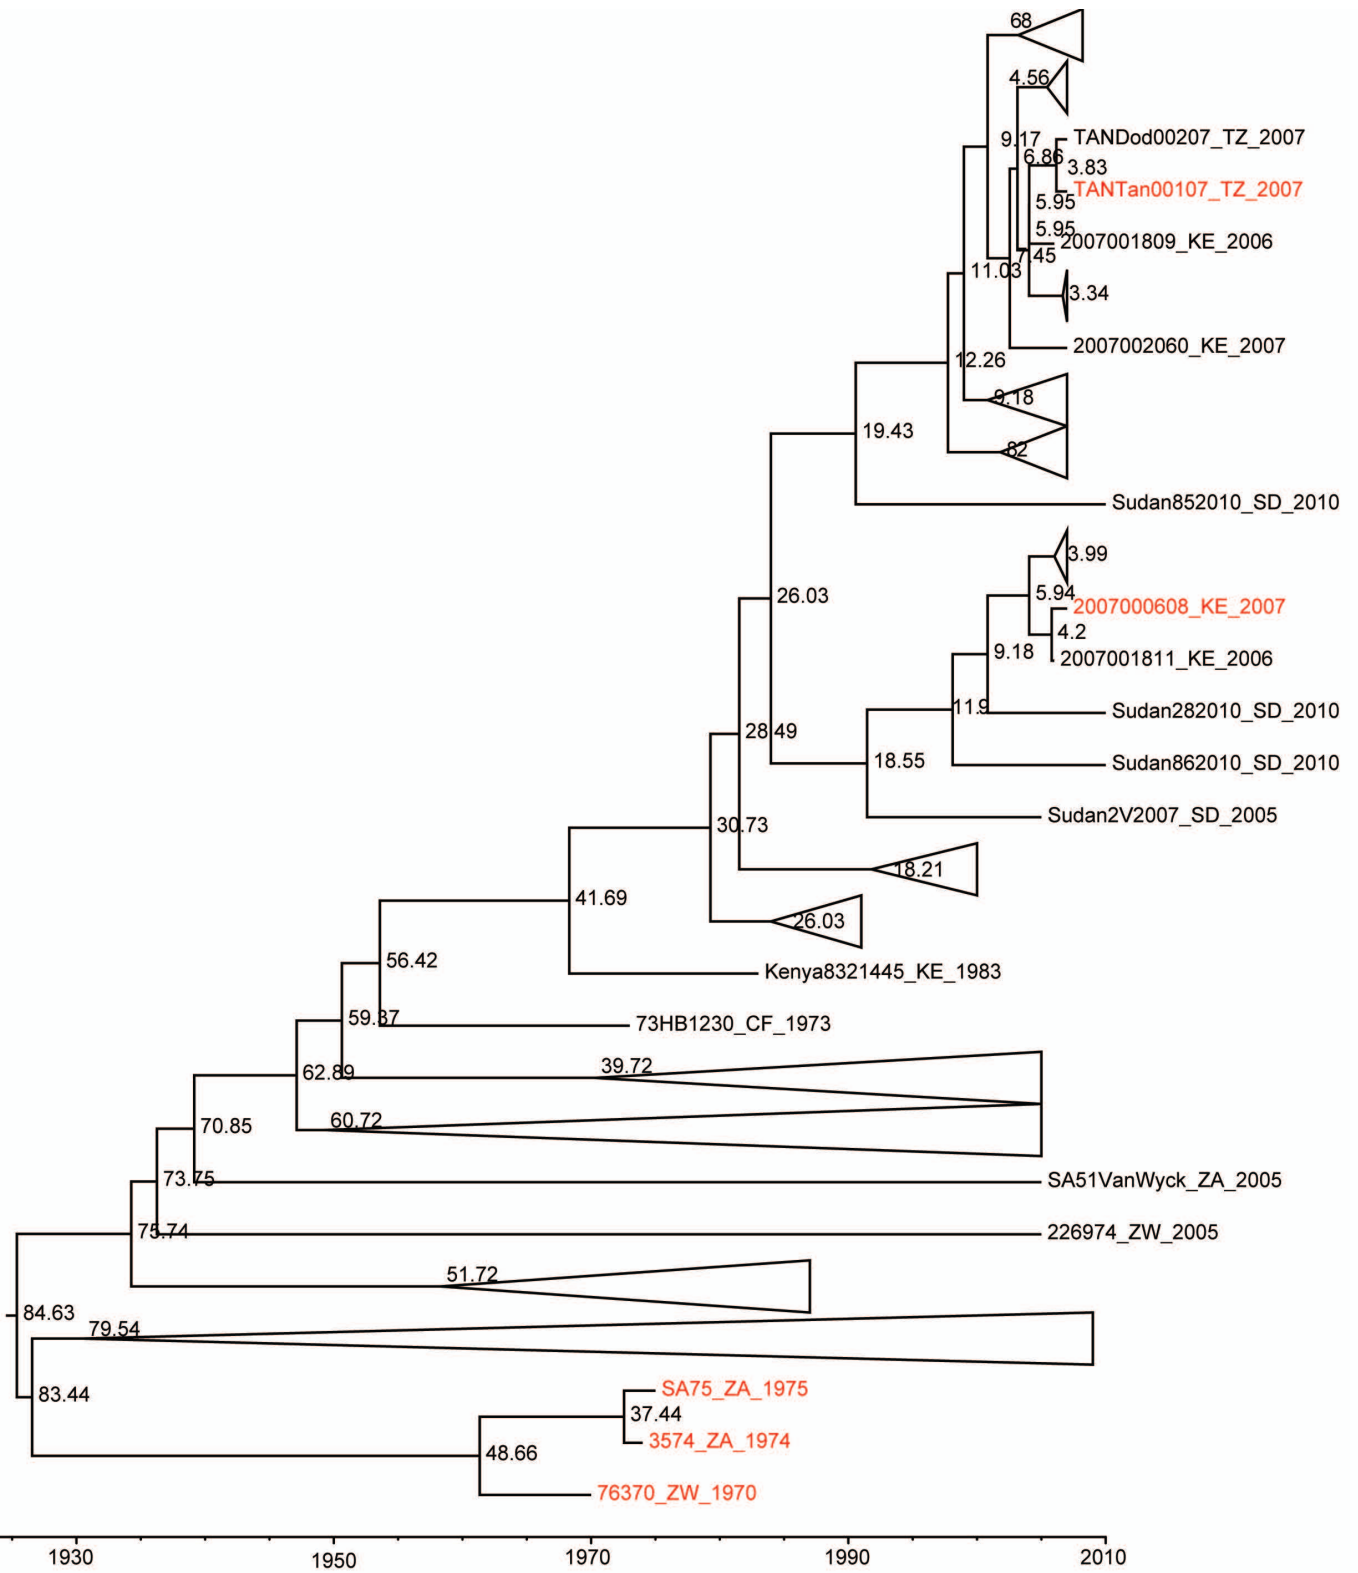

c)

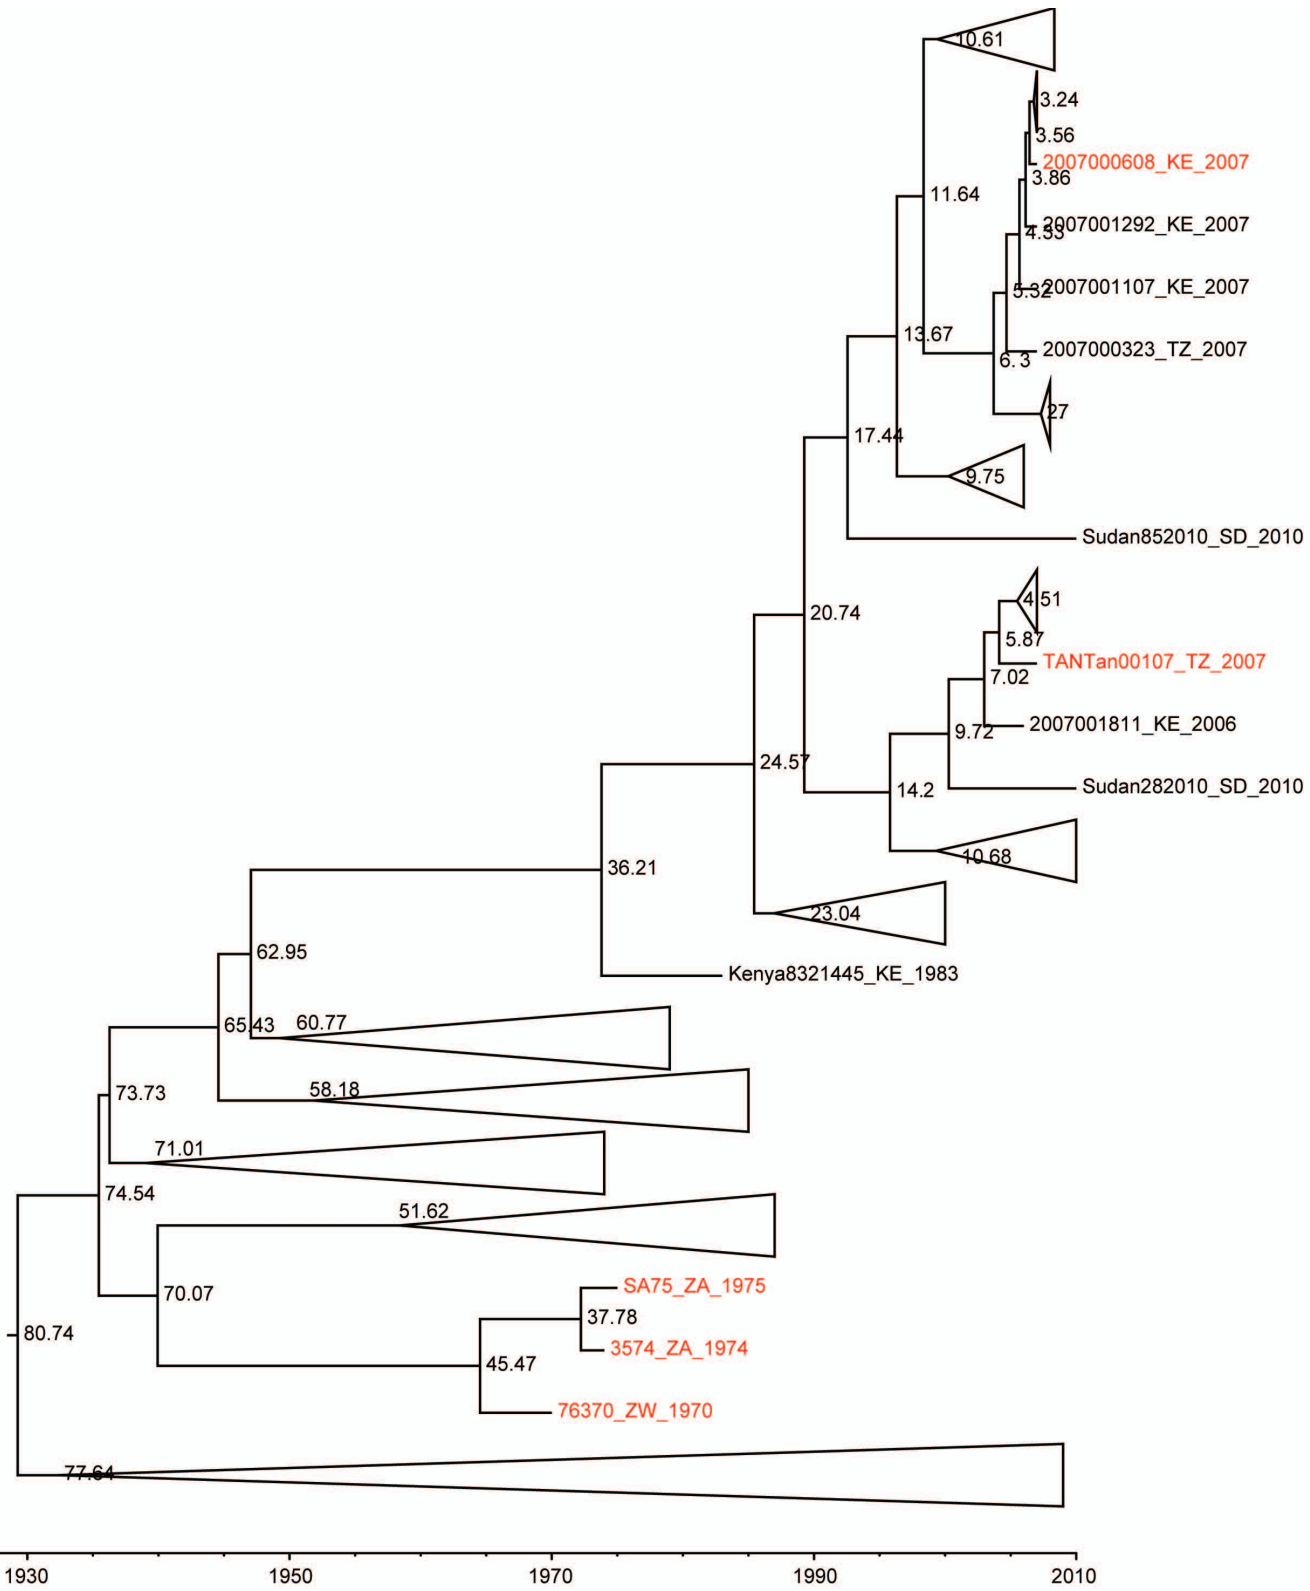

**Figure S2. Time-scaled MCC trees, showing times of reassortment.** A – MCC tree for L segment. B - MCC tree for M segment. C- MCC tree for S segment. Labels of reassortants are colored in red. TMRCA's are shown close to the nodes.

**Table S1. Significant detected codon sites under purifying selection in RVFV.**

| <b>Aa position</b> | <b>dN-dS</b> | <b>p-value</b> | <b>Gene</b> |
|--------------------|--------------|----------------|-------------|
| 27                 | -11.6951     | 0.02923        | Polymerase  |
| 47                 | -3.36074     | 0.02841        | Polymerase  |
| 77                 | -3.36074     | 0.02841        | Polymerase  |
| 90                 | -3.0764      | 0.03704        | Polymerase  |
| 105                | -3.0764      | 0.03842        | Polymerase  |
| 119                | -4.10187     | 0.01235        | Polymerase  |
| 146                | -4.10187     | 0.01235        | Polymerase  |
| 165                | -3.22378     | 0.03365        | Polymerase  |
| 168                | -4.97607     | 0.00478        | Polymerase  |
| 178                | -3.36074     | 0.02841        | Polymerase  |
| 201                | -3.0764      | 0.03704        | Polymerase  |
| 230                | -3.36074     | 0.02841        | Polymerase  |
| 253                | -3.0764      | 0.03704        | Polymerase  |
| 307                | -3.36074     | 0.03096        | Polymerase  |
| 308                | -3.36074     | 0.02841        | Polymerase  |
| 337                | -4.10187     | 0.01235        | Polymerase  |
| 355                | -4.47188     | 0.00921        | Polymerase  |
| 401                | -5.60124     | 0.00265        | Polymerase  |
| 416                | -3.0764      | 0.03704        | Polymerase  |
| 472                | -3.201       | 0.03288        | Polymerase  |
| 484                | -10.353      | 0.03302        | Polymerase  |
| 502                | -3.0764      | 0.03704        | Polymerase  |
| 533                | -4.48099     | 0.00867        | Polymerase  |
| 536                | -3.0764      | 0.03704        | Polymerase  |
| 538                | -3.36074     | 0.02841        | Polymerase  |
| 572                | -3.36074     | 0.03096        | Polymerase  |
| 588                | -3.34039     | 0.0301         | Polymerase  |
| 612                | -3.0764      | 0.0373         | Polymerase  |
| 697                | -3.36074     | 0.02841        | Polymerase  |
| 722                | -3.36074     | 0.02841        | Polymerase  |
| 745                | -4.10187     | 0.01325        | Polymerase  |
| 793                | -5.12734     | 0.00412        | Polymerase  |
| 799                | -3.36074     | 0.02841        | Polymerase  |
| 805                | -3.36074     | 0.02841        | Polymerase  |
| 834                | -5.60124     | 0.00265        | Polymerase  |
| 869                | -3.0764      | 0.03704        | Polymerase  |
| 885                | -3.36074     | 0.02975        | Polymerase  |
| 887                | -3.36074     | 0.02841        | Polymerase  |
| 930                | -4.48099     | 0.00867        | Polymerase  |
| 933                | -3.36074     | 0.02975        | Polymerase  |
| 961                | -4.10187     | 0.01235        | Polymerase  |
| 989                | -3.35158     | 0.03           | Polymerase  |
| 1004               | -3.3509      | 0.03002        | Polymerase  |
| 1065               | -6.72149     | 0.00096        | Polymerase  |
| 1077               | -3.36074     | 0.03096        | Polymerase  |
| 1084               | -3.35217     | 0.02998        | Polymerase  |
| 1126               | -3.36074     | 0.02975        | Polymerase  |
| 1129               | -3.0764      | 0.03704        | Polymerase  |
| 1135               | -4.09127     | 0.01338        | Polymerase  |
| 1177               | -4.268       | 0.01053        | Polymerase  |
| 1206               | -3.0764      | 0.03704        | Polymerase  |
| 1209               | -3.0764      | 0.03723        | Polymerase  |
| 1261               | -4.48099     | 0.00867        | Polymerase  |
| 1269               | -3.0764      | 0.03704        | Polymerase  |
| 1270               | -3.36074     | 0.02841        | Polymerase  |
| 1276               | -3.35449     | 0.02992        | Polymerase  |

|      |          |         |              |
|------|----------|---------|--------------|
| 1299 | -3.0764  | 0.03704 | Polymerase   |
| 1300 | -4.27435 | 0.01054 | Polymerase   |
| 1306 | -4.48099 | 0.00867 | Polymerase   |
| 1314 | -3.36074 | 0.02841 | Polymerase   |
| 1319 | -3.0764  | 0.03704 | Polymerase   |
| 1361 | -2.95185 | 0.04359 | Polymerase   |
| 1363 | -3.0764  | 0.03704 | Polymerase   |
| 1378 | -3.36074 | 0.02841 | Polymerase   |
| 1387 | -3.0764  | 0.03704 | Polymerase   |
| 1400 | -6       | 0.00137 | Polymerase   |
| 1428 | -4.36046 | 0.0375  | Polymerase   |
| 1453 | -3.27728 | 0.02841 | Polymerase   |
| 1484 | -3       | 0.03704 | Polymerase   |
| 1534 | -3.80291 | 0.03728 | Polymerase   |
| 1536 | -3.27728 | 0.02841 | Polymerase   |
| 1567 | -3       | 0.03704 | Polymerase   |
| 1569 | -10.5317 | 0.03165 | Polymerase   |
| 1572 | -4       | 0.01235 | Polymerase   |
| 1581 | -3.27728 | 0.02841 | Polymerase   |
| 1600 | -3.0764  | 0.03704 | Polymerase   |
| 1622 | -10.0005 | 0.03418 | Polymerase   |
| 1687 | -4.48099 | 0.00867 | Polymerase   |
| 1695 | -4.10187 | 0.01235 | Polymerase   |
| 1744 | -3.36074 | 0.02841 | Polymerase   |
| 1755 | -3.36074 | 0.02841 | Polymerase   |
| 1771 | -3.0764  | 0.03799 | Polymerase   |
| 1779 | -3.36074 | 0.02841 | Polymerase   |
| 1780 | -3.20983 | 0.03265 | Polymerase   |
| 1817 | -3.0764  | 0.03704 | Polymerase   |
| 1823 | -3.0764  | 0.03704 | Polymerase   |
| 1844 | -4.48099 | 0.00867 | Polymerase   |
| 1890 | -3.34054 | 0.0301  | Polymerase   |
| 1927 | -3.0764  | 0.03704 | Polymerase   |
| 1932 | -4.10187 | 0.01235 | Polymerase   |
| 1960 | -11.6664 | 0.0293  | Polymerase   |
| 1971 | -3.33967 | 0.03012 | Polymerase   |
| 1993 | -5.12734 | 0.00412 | Polymerase   |
| 1997 | -3.36074 | 0.02841 | Polymerase   |
| 2001 | -3.36074 | 0.02841 | Polymerase   |
| 2017 | -3.21033 | 0.03269 | Polymerase   |
| 2029 | -3.36074 | 0.02841 | Polymerase   |
| 2045 | -3.34581 | 0.02995 | Polymerase   |
| 28   | -3.54248 | 0.02687 | Glycoprotein |
| 30   | -3.54978 | 0.02675 | Glycoprotein |
| 59   | -3.11896 | 0.03706 | Glycoprotein |
| 64   | -3.34519 | 0.03024 | Glycoprotein |
| 115  | -3.11896 | 0.03704 | Glycoprotein |
| 165  | -3.11896 | 0.03736 | Glycoprotein |
| 172  | -45.5896 | 0.0075  | Glycoprotein |
| 179  | -3.54978 | 0.02675 | Glycoprotein |
| 198  | -4.15861 | 0.01294 | Glycoprotein |
| 200  | -3.54978 | 0.02512 | Glycoprotein |
| 202  | -3.11896 | 0.03704 | Glycoprotein |
| 205  | -3.11896 | 0.04026 | Glycoprotein |
| 211  | -3.11896 | 0.03704 | Glycoprotein |
| 225  | -5.91631 | 0.00216 | Glycoprotein |
| 326  | -3       | 0.03704 | Glycoprotein |



|      |          |         |                |
|------|----------|---------|----------------|
| 346  | -0.00287 | 0.00116 | Glycoprotein   |
| 349  | -3.40939 | 0.0269  | Glycoprotein   |
| 362  | -3.41125 | 0.02686 | Glycoprotein   |
| 429  | -4.5416  | 0.00904 | Glycoprotein   |
| 447  | -3.03944 | 0.03704 | Glycoprotein   |
| 458  | -4.05258 | 0.01242 | Glycoprotein   |
| 482  | -3.45928 | 0.02675 | Glycoprotein   |
| 490  | -3.03944 | 0.03927 | Glycoprotein   |
| 509  | -3.03944 | 0.03861 | Glycoprotein   |
| 515  | -4.15861 | 0.0135  | Glycoprotein   |
| 519  | -3.11896 | 0.03704 | Glycoprotein   |
| 520  | -3.11896 | 0.03704 | Glycoprotein   |
| 522  | -4.42128 | 0.00966 | Glycoprotein   |
| 557  | -4.15861 | 0.01235 | Glycoprotein   |
| 591  | -3.11896 | 0.03704 | Glycoprotein   |
| 601  | -4.15861 | 0.01235 | Glycoprotein   |
| 624  | -3.31596 | 0.03082 | Glycoprotein   |
| 648  | -3.34292 | 0.03055 | Glycoprotein   |
| 670  | -3.63879 | 0.04527 | Glycoprotein   |
| 672  | -3.31596 | 0.03082 | Glycoprotein   |
| 705  | -4.15861 | 0.01235 | Glycoprotein   |
| 738  | -3.54665 | 0.02685 | Glycoprotein   |
| 769  | -3.11896 | 0.03704 | Glycoprotein   |
| 781  | -3.11896 | 0.03711 | Glycoprotein   |
| 793  | -3.54978 | 0.02512 | Glycoprotein   |
| 807  | -3.11896 | 0.03704 | Glycoprotein   |
| 824  | -4.15861 | 0.01264 | Glycoprotein   |
| 893  | -3.54978 | 0.02512 | Glycoprotein   |
| 923  | -3.31596 | 0.03082 | Glycoprotein   |
| 958  | -3.11896 | 0.03704 | Glycoprotein   |
| 971  | -3.54978 | 0.02512 | Glycoprotein   |
| 1001 | -3.11896 | 0.03704 | Glycoprotein   |
| 1051 | -3.11896 | 0.03704 | Glycoprotein   |
| 1090 | -4.15861 | 0.01235 | Glycoprotein   |
| 1115 | -11.0793 | 0.01055 | Glycoprotein   |
| 1116 | -3.11896 | 0.03704 | Glycoprotein   |
| 1127 | -4.15861 | 0.01242 | Glycoprotein   |
| 1128 | -3.11896 | 0.03721 | Glycoprotein   |
| 1141 | -3.54978 | 0.02512 | Glycoprotein   |
| 1159 | -3.11896 | 0.03704 | Glycoprotein   |
| 1184 | -3.11896 | 0.03704 | Glycoprotein   |
| 1191 | -3.11896 | 0.03704 | Glycoprotein   |
| 1192 | -3.11896 | 0.03704 | Glycoprotein   |
| 56   | -3.37716 | 0.02596 | Nucleocapsid   |
| 88   | -0.00013 | 0.00182 | Nucleocapsid   |
| 116  | -5       | 0.00464 | Nucleocapsid   |
| 119  | -3       | 0.03992 | Nucleocapsid   |
| 127  | -3       | 0.03712 | Nucleocapsid   |
| 142  | -4       | 0.01235 | Nucleocapsid   |
| 148  | -3.37716 | 0.02596 | Nucleocapsid   |
| 151  | -3.75137 | 0.03667 | Nucleocapsid   |
| 170  | -3       | 0.03704 | Nucleocapsid   |
| 192  | -3.49253 | 0.04557 | Nucleocapsid   |
| 254  | -4.78769 | 0.00751 | Nucleocapsid   |
| 76   | -3       | 0.03928 | Non-structural |
| 90   | -3.34013 | 0.02977 | Non-structural |
| 95   | -3       | 0.03712 | Non-structural |

|     |          |         |                |
|-----|----------|---------|----------------|
| 97  | -3       | 0.03704 | Non-structural |
| 186 | -3       | 0.03704 | Non-structural |
| 209 | -9.60123 | 0.03472 | Non-structural |
| 226 | -4       | 0.01235 | Non-structural |
| 232 | -3       | 0.03704 | Non-structural |
| 240 | -3       | 0.03704 | Non-structural |

**Table S2. Akaike's information estimated by Markov chain Monte Carlo (AICM) and path-sampling tests for different prior propositions to explain evolution of RVFV strains.**

| <b>Segment</b> | <b>AICM</b> | <b>S.E.</b> | <b>Diference between AICM</b> | <b>marginal log(L) from PS</b> | <b>Mean rate (m)</b> | <b>HPD</b>           |
|----------------|-------------|-------------|-------------------------------|--------------------------------|----------------------|----------------------|
| Long           | 41130.913   | 0.455       | 4.107                         | -13207.78                      | 2.31E-04             | (1.88E-4 to 2.72E-4) |
| Long           | 41135.021   | 0.259       | -4.107                        | -18826.17                      | 3.28E-04             | (2.56E-4 to 3.98E-4) |
| Medium         | 27870.334   | 0.298       | 6.654                         | -14206.09                      | 3.80E-04             | (2.53E-4 to 5.05E-4) |
| Medium         | 27876.988   | 0.199       | -6.654                        | -14208.76                      | 2.00E-04             | (1.52E-4 to 2.4E-4)  |
| Small          | 11867.499   | 0.31        | 17.718                        | -5687.28                       | 3.36E-04             | (2.42E-4 to 4.26E-4) |
| Small          | 11885.217   | 0.217       | -17.718                       | -5413.06                       | 2.10E-04             | (1.66E-4 to 2.47e-4) |

**Table S3. RVFV strains used in this study.**

| Strain name    | Locality of isolation          | Collection date | Accession number | Host                       | Segment |
|----------------|--------------------------------|-----------------|------------------|----------------------------|---------|
| ARD38388       | BurkinaFaso                    | 1983            | DQ375399.1       | mosquito                   | Long    |
| 73HB1230       | CentralAfricanRepublic         | 1973            | DQ375425.1       | human                      | Long    |
| 73HB1449       | CentralAfricanRepublic         | 1974            | DQ375416.1       | human                      | Long    |
| 74HB59         | CentralAfricanRepublic         | 1974            | DQ375415.1       | human                      | Long    |
| Zinga          | CentralAfricanRepublic         | 1969            | DQ375419.1       | human                      | Long    |
| CARR1622       | CentralAfricanRepublic\$Bangui | 1985            | DQ375423.1       | human                      | Long    |
| HvB375         | CentralAfricanRepublic\$Mbaki  | 1985            | DQ375422.1       | human                      | Long    |
| ZC3349         | Egypt\$Asyut                   | 1978            | DQ375412.1       | bovine                     | Long    |
| ZH1776         | Egypt\$Gharbiya                | 1978            | DQ375411.1       | human                      | Long    |
| ZS6365         | Egypt\$Gharbiya                | 1979            | DQ375410.1       | ovine                      | Long    |
| T46228113      | Egypt\$Sharqiya                | 1977            | DQ375405.1       | mosquito                   | Long    |
| T1             | Egypt\$Sharqiya                | 1977            | DQ375407.1       | mosquito                   | Long    |
| ZH501          | Egypt\$Sharqiya                | 1977            | DQ375406.1       | human                      | Long    |
| ZH548          | Egypt\$Sharqiya                | 1977            | DQ375403.1       | human                      | Long    |
| ZM657          | Egypt\$Sharqiya                | 1978            | DQ375409.1       | mosquito                   | Long    |
| ZH501777       | Egypt\$Sharqiya                | 1977            | DQ375408.1       | plaque pick of RVFV ZH-501 | Long    |
| ANK3837        | Guinea                         | 1981            | DQ375420.1       | bat                        | Long    |
| ANK6087        | Guinea                         | 1984            | DQ375421.1       | bat                        | Long    |
| 2007000234     | Kenya                          | 2007            | JF326186.1       | human                      | Long    |
| KEN/Bar032/07  | Kenya                          | 3-Feb-07        | HM586957.1       | human                      | Long    |
| KEN/Bar035/07  | Kenya                          | 30-Jan-07       | HM586958.1       | human                      | Long    |
| KEN/Gar004/06  | Kenya                          | 21-Dec-06       | HM586953.1       | human                      | Long    |
| KEN/Gar008/06  | Kenya                          | 21-Dec-06       | HM586954.1       | human                      | Long    |
| KEN/Kil006/07  | Kenya                          | 5-Jan-07        | HM586955.1       | human                      | Long    |
| KEN/Mal032/07  | Kenya                          | 15-Jan-07       | HM586956.1       | human                      | Long    |
| Kenya9800523   | Kenya                          | 1998            | DQ375400.1       | human                      | Long    |
| Kenya57Rintoul | Kenya                          | 1951            | DQ375431.1       | ovine                      | Long    |
| 2007003644     | Kenya\$Baringodistrict         | 7-Feb-07        | EU574006.1       | ovine                      | Long    |
| 2007001809     | Kenya\$Garissadistrict         | 1-Dec-06        | EU574015.1       | caprine                    | Long    |
| 2007000094     | Kenya\$Garissadistrict         | 12-Jan-07       | EU574029.1       | bovine                     | Long    |
| 2007001811     | Kenya\$Garissadistrict         | 1-Dec-06        | EU574014.1       | caprine                    | Long    |
| 2007000473     | Kenya\$Kajaidodistrict         | 26-Jan-07       | EU574024.1       | ovine                      | Long    |
| 2007004194     | Kenya\$Kiambudistrict          | 14-May-07       | EU574004.1       | bovine                     | Long    |
| 2007000080     | Kenya\$Maraguadistrict         | 12-Jan-07       | EU574030.1       | bovine                     | Long    |
| 2007000222     | Kenya\$Maraguadistrict         | 16-Jan-07       | EU574028.1       | bovine                     | Long    |
| 2007000223     | Kenya\$Maraguadistrict         | 16-Jan-07       | EU574027.1       | bovine                     | Long    |
| 2007000224     | Kenya\$Maraguadistrict         | 16-Jan-07       | EU574026.1       | bovine                     | Long    |
| 2007000225     | Kenya\$Maraguadistrict         | 16-Jan-07       | EU574025.1       | bovine                     | Long    |
| 2007003081     | Kenya\$Mbeeredistrict          | 27-Feb-07       | EU574007.1       | bovine                     | Long    |
| 2007002444     | Kenya\$MeruCentraldistrict     | 5-Feb-07        | EU574012.1       | bovine                     | Long    |
| 2007002445     | Kenya\$MeruCentraldistrict     | 5-Feb-07        | EU574011.1       | bovine                     | Long    |
| 2007000608     | Kenya\$MeruSouthdistrict       | 29-Jan-07       | EU574023.1       | bovine                     | Long    |
| 2007000611     | Kenya\$MeruSouthdistrict       | 29-Jan-07       | EU574022.1       | bovine                     | Long    |
| 2007000618     | Kenya\$MeruSouthdistrict       | 29-Jan-07       | EU574021.1       | bovine                     | Long    |
| 2007001292     | Kenya\$MeruSouthdistrict       | 31-Jan-07       | EU574019.1       | bovine                     | Long    |
| 2007001602     | Kenya\$Mombassadistrict        | 30-Jan-07       | EU574016.1       | bovine                     | Long    |
| 2007001564     | Kenya\$Murangadistrict         | 29-Jan-07       | EU574017.1       | bovine                     | Long    |
| 2007002060     | Kenya\$Nairobiidistrict        | 31-Jan-07       | EU574013.1       | bovine                     | Long    |
| 2007004193     | Kenya\$Nairobiidistrict        | 23-Apr-07       | EU574005.1       | bovine                     | Long    |
| 2007001443     | Kenya\$Nakurudistrict          | 31-Jan-07       | EU574018.1       | bovine                     | Long    |
| 2007002476     | Kenya\$Nakurudistrict          | 21-Feb-07       | EU574010.1       | bovine                     | Long    |
| Kenya8321445   | Kenya\$Ruiru                   | 1983            | DQ375402.1       | mosquito                   | Long    |
| 2007001107     | Kenya\$Thikadistrict           | 25-Jan-07       | EU574020.1       | bovine                     | Long    |
| 2007002482     | Kenya\$Thikadistrict           | 21-Feb-07       | EU574009.1       | bovine                     | Long    |
| 40608          | Madagascar                     | 20-Feb-08       | GQ443177.1       | bovine                     | Long    |
| 41308          | Madagascar                     | 20-Feb-08       | GQ443178.1       | bovine                     | Long    |
| 85508          | Madagascar                     | 24-Mar-08       | GQ443200.1       | bovine                     | Long    |
| 162708         | Madagascar                     | 18-Apr-08       | GQ443212.1       | bovine                     | Long    |
| 173008         | Madagascar                     | 25-Apr-08       | GQ443214.1       | bovine                     | Long    |
| 158508         | Madagascar                     | 13-Apr-08       | GQ443210.1       | caprine                    | Long    |
| 21208          | Madagascar                     | 30-Jan-08       | GQ443176.1       | human                      | Long    |
| 42708          | Madagascar                     | 22-Feb-08       | GQ443179.1       | human                      | Long    |
| 42808          | Madagascar                     | 15-Feb-08       | GQ443180.1       | human                      | Long    |
| 44808          | Madagascar                     | 26-Feb-08       | GQ443182.1       | human                      | Long    |
| 61908          | Madagascar                     | 9-Mar-08        | GQ443184.1       | human                      | Long    |
| 68208          | Madagascar                     | 12-Mar-08       | GQ443185.1       | human                      | Long    |
| 68308          | Madagascar                     | 12-Mar-08       | GQ443186.1       | human                      | Long    |
| 68408          | Madagascar                     | 12-Mar-08       | GQ443187.1       | human                      | Long    |
| 69308          | Madagascar                     | 11-Mar-08       | GQ443188.1       | human                      | Long    |
| 77608          | Madagascar                     | 14-Mar-08       | GQ443189.1       | human                      | Long    |
| 84508          | Madagascar                     | 23-Mar-08       | GQ443191.1       | human                      | Long    |
| 84608          | Madagascar                     | 23-Mar-08       | GQ443192.1       | human                      | Long    |
| 84708          | Madagascar                     | 23-Mar-08       | GQ443193.1       | human                      | Long    |
| 84808          | Madagascar                     | 23-Mar-08       | GQ443194.1       | human                      | Long    |
| 84908          | Madagascar                     | 23-Mar-08       | GQ443195.1       | human                      | Long    |
| 85108          | Madagascar                     | 23-Mar-08       | GQ443196.1       | human                      | Long    |
| 85208          | Madagascar                     | 23-Mar-08       | GQ443197.1       | human                      | Long    |
| 85308          | Madagascar                     | 23-Mar-08       | GQ443198.1       | human                      | Long    |
| 85408          | Madagascar                     | 23-Mar-08       | GQ443199.1       | human                      | Long    |
| 86308          | Madagascar                     | 25-Mar-08       | GQ443203.1       | human                      | Long    |

|                |                                |           |            |                       |        |
|----------------|--------------------------------|-----------|------------|-----------------------|--------|
| 87808          | Madagascar                     | 26-Mar-08 | GQ443204.1 | human                 | Long   |
| 87908          | Madagascar                     | 26-Mar-08 | GQ443205.1 | human                 | Long   |
| 89208          | Madagascar                     | 26-Mar-08 | GQ443206.1 | human                 | Long   |
| 89508          | Madagascar                     | 26-Mar-08 | GQ443207.1 | human                 | Long   |
| 89708          | Madagascar                     | 26-Mar-08 | GQ443208.1 | human                 | Long   |
| 146408         | Madagascar                     | 28-Mar-08 | GQ443209.1 | human                 | Long   |
| 158608         | Madagascar                     | 15-Apr-08 | GQ443211.1 | human                 | Long   |
| 203208         | Madagascar                     | 25-May-08 | GQ443215.1 | human                 | Long   |
| 203308         | Madagascar                     | 29-Apr-08 | GQ443216.1 | human                 | Long   |
| 203408         | Madagascar                     | 23-Apr-08 | GQ443217.1 | human                 | Long   |
| MgH824         | Madagascar                     | 1979      | DQ375414.1 | human                 | Long   |
| 169508         | Madagascar                     | 20-Apr-08 | GQ443213.1 | ovine                 | Long   |
| 200803163      | Madagascar\$Anjozorobe         | Feb-08    | JF311369.1 | human                 | Long   |
| 200803164      | Madagascar\$Ankazobe           | Mar-08    | JF311370.1 | human                 | Long   |
| 200803167      | Madagascar\$Antananarivo       | Feb-91    | JF311373.1 | bovine                | Long   |
| 200803166      | Madagascar\$Antananarivo       | Feb-91    | JF311372.1 | human                 | Long   |
| 200803169      | Madagascar\$Antsirabe          | Feb-08    | JF311375.1 | bovine                | Long   |
| 200803170      | Madagascar\$Manjakandriana     | Mar-08    | JF311376.1 | bovine                | Long   |
| 200803165      | Madagascar\$Manjakandriana     | Mar-08    | JF311371.1 | human                 | Long   |
| 200803168      | Madagascar\$Miarinarivo        | Feb-08    | JF311374.1 | bovine                | Long   |
| 200803162      | Madagascar\$Taolagnaro         | Jan-08    | JF311368.1 | human                 | Long   |
| OS1            | Mauritania                     | 1987      | DQ375398.1 | human                 | Long   |
| OS3            | Mauritania                     | 1987      | DQ375396.1 | human                 | Long   |
| OS8            | Mauritania                     | 1987      | DQ375395.1 | human                 | Long   |
| OS9            | Mauritania                     | 1987      | DQ375397.1 | human                 | Long   |
| 2008/00099     | Mayotte                        | 21-Feb-08 | HE687304.1 | human                 | Long   |
| 2008/00101     | Mayotte                        | 20-Mar-08 | HE687305.1 | human                 | Long   |
| Saudi200010911 | SaudiArabia                    | 2000      | DQ375401.1 | human                 | Long   |
| 35/74          | SouthAfrica                    | 1974      | JF784386.1 | sheep                 | Long   |
| Kakamas        | SouthAfrica                    | Oct-09    | JQ068144.1 | sheep                 | Long   |
| SA51VanWyck    | SouthAfrica\$Boshof            | 1951      | DQ375433.1 | ovine                 | Long   |
| SA75           | SouthAfrica\$Randfontein       | 1975      | DQ375428.1 | human                 | Long   |
| Sudan282010    | Sudan\$GeziraState             | Oct-10    | JQ820486.1 | human                 | Long   |
| Sudan852010    | Sudan\$GeziraState             | Oct-10    | JQ820485.1 | human                 | Long   |
| Sudan862010    | Sudan\$GeziraState             | Oct-10    | JQ820484.1 | human                 | Long   |
| Sudan2V2007    | Sudan\$WhiteNileState          | 2007      | JQ820483.1 | human                 | Long   |
| 2007000323     | Tanzania                       | Feb-07    | JF326189.1 | human                 | Long   |
| 2007000324     | Tanzania                       | Feb-07    | JF326190.1 | human                 | Long   |
| TAN/Dod002/07  | Tanzania                       | 14-Mar-07 | HM586960.1 | human                 | Long   |
| TAN/Tan001/07  | Tanzania                       | 8-Feb-07  | HM586959.1 | human                 | Long   |
| Entebbe        | Uganda                         | 1944      | DQ375429.1 | mosquito              | Long   |
| 2250/74        | Zimbabwe\$Beatrice             | 1974      | DQ375413.1 | bovine                | Long   |
| 1260/78        | Zimbabwe\$Salisbury            | 1978      | DQ375418.1 | bovine                | Long   |
| 2373/74        | Zimbabwe\$Salisbury            | 1974      | DQ375432.1 | bovine                | Long   |
| 763/70         | Zimbabwe\$Salisbury            | 1970      | DQ375426.1 | bovine                | Long   |
| 1853/78        | Zimbabwe\$Sinoia               | 1978      | DQ375424.1 | bovine                | Long   |
| 2269/74        | Zimbabwe\$Sinoia               | 1974      | DQ375434.1 | bovine                | Long   |
| ARD38388       | BurkinaFaso                    | 1983      | DQ380187.1 | mosquito              | Medium |
| 73HB1230       | CentralAfricanRepublic         | 1973      | DQ380221.1 | human                 | Medium |
| 73HB1449       | CentralAfricanRepublic         | 1973      | DQ380211.1 | human                 | Medium |
| 74HB59         | CentralAfricanRepublic         | 1974      | HM587082.1 | human                 | Medium |
| Zinga          | CentralAfricanRepublic         | 1969      | DQ380217.1 | mosquito              | Medium |
| HvB375         | CentralAfricanRepublic\$Abaki  | 7-Jun-05  | DQ380218.1 | human                 | Medium |
| CARR1622       | CentralAfricanRepublic\$Bangui | 7-Jun-05  | DQ380219.1 | human                 | Medium |
| T1             | Egypt                          | 1977      | DQ380201.1 | mosquito              | Medium |
| T46228113      | Egypt                          | 1977      | DQ380199.1 | mosquito              | Medium |
| ZH501777       | Egypt                          | 1977      | DQ380202.1 | plaque pick of ZH-501 | Medium |
| ZC3349         | Egypt\$Asyut                   | 31-May-05 | DQ380207.1 | bovine                | Medium |
| ZH1776         | Egypt\$Gharbiya                | 31-May-05 | DQ380203.1 | human                 | Medium |
| ZS6365         | Egypt\$Gharbiya                | 1-Jun-05  | DQ380205.1 | ovine                 | Medium |
| ZH501          | Egypt\$Sharqiya                | 30-May-05 | DQ380200.1 | human                 | Medium |
| ZH548          | Egypt\$Sharqiya                | 30-May-05 | DQ380206.1 | human                 | Medium |
| ZM657          | Egypt\$Sharqiya                | 31-May-05 | DQ380204.1 | mosquito              | Medium |
| ANK3837        | Guinea                         | 3-Jun-05  | DQ380215.1 | bat                   | Medium |
| ANK6087        | Guinea                         | 6-Jun-05  | DQ380216.1 | bat                   | Medium |
| 2007000234     | Kenya                          | 29-Jun-05 | JF326191.1 | human                 | Medium |
| 2007000253     | Kenya                          | 29-Dec-06 | JF326192.1 | mosquito              | Medium |
| KEN/Bar032/07  | Kenya                          | 3-Feb-07  | HM586968.1 | Unknown               | Medium |
| KEN/Bar035/07  | Kenya                          | 30-Jan-07 | HM586969.1 | Unknown               | Medium |
| KEN/Gar004/06  | Kenya                          | 21-Dec-06 | HM586964.1 | Unknown               | Medium |
| KEN/Gar008/06  | Kenya                          | 21-Dec-06 | HM586965.1 | Unknown               | Medium |
| KEN/Kii006/07  | Kenya                          | 5-Jan-07  | HM586966.1 | Unknown               | Medium |
| KEN/Mal032/07  | Kenya                          | 15-Jan-07 | HM586967.1 | Unknown               | Medium |
| Kenya9800523   | Kenya                          | 1998      | DQ380196.1 | human                 | Medium |
| 2007003644     | Kenya\$Baringodistrict         | 7-Feb-07  | EU574033.1 | ovine                 | Medium |
| 2007001809     | Kenya\$Garissadistrict         | 1-Dec-06  | EU574041.1 | caprine               | Medium |
| 2007000094     | Kenya\$Garissadistrict         | 12-Jan-07 | EU574055.1 | bovine                | Medium |
| 2007001811     | Kenya\$Garissadistrict         | 1-Dec-06  | EU574040.1 | caprine               | Medium |
| 2007000473     | Kenya\$Kajaidodistrict         | 26-Jan-07 | EU574050.1 | ovine                 | Medium |
| 2007004194     | Kenya\$Kiambudistrict          | 14-May-07 | EU574031.1 | bovine                | Medium |
| Kenya57Rintoul | Kenya\$Kitale                  | 1951      | DQ380192.1 | ovine                 | Medium |

|              |                                      |                      |          |        |
|--------------|--------------------------------------|----------------------|----------|--------|
| 2007000080   | Kenya\$Maraguadistrict               | 12-Jan-07 EU574056.1 | bovine   | Medium |
| 2007000222   | Kenya\$Maraguadistrict               | 16-Jan-07 EU574054.1 | bovine   | Medium |
| 2007000223   | Kenya\$Maraguadistrict               | 16-Jan-07 EU574053.1 | bovine   | Medium |
| 2007000224   | Kenya\$Maraguadistrict               | 16-Jan-07 EU574052.1 | bovine   | Medium |
| 2007000225   | Kenya\$Maraguadistrict               | 16-Jan-07 EU574051.1 | bovine   | Medium |
| 2007003081   | Kenya\$Mbeeredistrict                | 27-Feb-07 EU574034.1 | bovine   | Medium |
| 2007002444   | Kenya\$MeruCentraldistrict           | 5-Feb-07 EU574038.1  | bovine   | Medium |
| 2007002445   | Kenya\$MeruCentraldistrict           | 5-Feb-07 EU574037.1  | bovine   | Medium |
| 2007000608   | Kenya\$MeruSouthdistrict             | 29-Jan-07 EU574049.1 | bovine   | Medium |
| 2007000611   | Kenya\$MeruSouthdistrict             | 29-Jan-07 EU574048.1 | bovine   | Medium |
| 2007000618   | Kenya\$MeruSouthdistrict             | 29-Jan-07 EU574042.1 | bovine   | Medium |
| 2007001292   | Kenya\$MeruSouthdistrict             | 31-Jan-07 EU574046.1 | bovine   | Medium |
| 2007001602   | Kenya\$Mombassadistrict              | 30-Jan-07 EU574043.1 | bovine   | Medium |
| 2007001564   | Kenya\$Murangadistrict               | 29-Jan-07 EU574044.1 | bovine   | Medium |
| 2007002060   | Kenya\$Nairobiidistrict              | 31-Jan-07 EU574039.1 | bovine   | Medium |
| 2007004193   | Kenya\$Nairobiidistrict              | 23-Apr-07 EU574032.1 | bovine   | Medium |
| 2007001443   | Kenya\$Nakurudistrict                | 31-Jan-07 EU574045.1 | bovine   | Medium |
| 2007002476   | Kenya\$Nakurudistrict                | 21-Feb-07 EU574036.1 | bovine   | Medium |
| Kenya8321445 | Kenya\$Ruiru                         | 1983 DQ380198.1      | mosquito | Medium |
| 2007001107   | Kenya\$Thikadistrict                 | 25-Jan-07 EU574047.1 | bovine   | Medium |
| 2007002482   | Kenya\$Thikadistrict                 | 21-Feb-07 EU574035.1 | bovine   | Medium |
| 21208        | Madagascar                           | 30-Jan-08 GQ443218.1 | human    | Medium |
| 40608        | Madagascar                           | Feb-08 GQ443219.1    | bovine   | Medium |
| 41308        | Madagascar                           | Feb-08 GQ443220.1    | bovine   | Medium |
| 42708        | Madagascar                           | 22-Feb-08 GQ443221.1 | human    | Medium |
| 42808        | Madagascar                           | 15-Feb-08 GQ443222.1 | human    | Medium |
| 44808        | Madagascar                           | 26-Feb-08 GQ443223.1 | human    | Medium |
| 61908        | Madagascar                           | Mar-08 GQ443224.1    | human    | Medium |
| 68208        | Madagascar                           | 12-Mar-08 GQ443225.1 | human    | Medium |
| 68308        | Madagascar                           | 12-Mar-08 GQ443226.1 | human    | Medium |
| 68408        | Madagascar                           | 12-Mar-08 GQ443227.1 | human    | Medium |
| 69308        | Madagascar                           | Mar-08 GQ443228.1    | human    | Medium |
| 77608        | Madagascar                           | 14-Mar-08 GQ443229.1 | human    | Medium |
| 84508        | Madagascar                           | 23-Mar-08 GQ443230.1 | human    | Medium |
| 84608        | Madagascar                           | 23-Mar-08 GQ443231.1 | human    | Medium |
| 84708        | Madagascar                           | 23-Mar-08 GQ443232.1 | human    | Medium |
| 84808        | Madagascar                           | 23-Mar-08 GQ443233.1 | human    | Medium |
| 84908        | Madagascar                           | 23-Mar-08 GQ443234.1 | human    | Medium |
| 85008        | Madagascar                           | Mar-08 GQ443235.1    | human    | Medium |
| 85108        | Madagascar                           | 23-Mar-08 GQ443236.1 | human    | Medium |
| 85208        | Madagascar                           | 23-Mar-08 GQ443237.1 | human    | Medium |
| 85308        | Madagascar                           | 23-Mar-08 GQ443238.1 | human    | Medium |
| 85408        | Madagascar                           | 23-Mar-08 GQ443239.1 | human    | Medium |
| 85508        | Madagascar                           | 24-Mar-08 GQ443240.1 | bovine   | Medium |
| 86308        | Madagascar                           | 25-Mar-08 GQ443241.1 | human    | Medium |
| 87808        | Madagascar                           | 26-Mar-08 GQ443242.1 | human    | Medium |
| 87908        | Madagascar                           | 26-Mar-08 GQ443243.1 | human    | Medium |
| 88908        | Madagascar                           | 26-Mar-08 GQ443244.1 | human    | Medium |
| 89208        | Madagascar                           | 26-Mar-08 GQ443245.1 | human    | Medium |
| 89508        | Madagascar                           | 26-Mar-08 GQ443246.1 | human    | Medium |
| 89708        | Madagascar                           | 26-Mar-08 GQ443247.1 | human    | Medium |
| 146408       | Madagascar                           | Mar-08 GQ443248.1    | human    | Medium |
| 158508       | Madagascar                           | Apr-08 GQ443249.1    | caprine  | Medium |
| 158608       | Madagascar                           | 15-Apr-08 GQ443250.1 | human    | Medium |
| 162708       | Madagascar                           | 18-Apr-08 GQ443251.1 | bovine   | Medium |
| 169508       | Madagascar                           | 20-Apr-08 GQ443252.1 | ovine    | Medium |
| 173008       | Madagascar                           | Apr-08 GQ443253.1    | bovine   | Medium |
| 203208       | Madagascar                           | May-08 GQ443254.1    | human    | Medium |
| 203308       | Madagascar                           | 29-Apr-08 GQ443255.1 | human    | Medium |
| 203408       | Madagascar                           | 23-Apr-08 GQ443256.1 | human    | Medium |
| MgH824       | Madagascar                           | 1-Jun-05 HM587040.1  | human    | Medium |
| FI28         | Madagascar\$AmpandrambatoSahambavy   | 19-Dec-08 GU135857.1 | mosquito | Medium |
| 200803163    | Madagascar\$Anjozorobe               | Feb-08 JF311378.1    | human    | Medium |
| 200803164    | Madagascar\$Ankazobe                 | 1-Mar-08 JF311379.1  | human    | Medium |
| 200803166    | Madagascar\$Antananarivo             | Feb-91 JF311381.1    | human    | Medium |
| 200803167    | Madagascar\$Antananarivo             | Feb-91 JF311382.1    | bovine   | Medium |
| FI148        | Madagascar\$AntanifotsyFianarantsoal | 19-Dec-08 GU135859.1 | mosquito | Medium |
| 200803169    | Madagascar\$Antsirabe                | 1-Feb-08 JF311384.1  | bovine   | Medium |
| 200803165    | Madagascar\$Manjakandriana           | Mar-08 JF311380.1    | human    | Medium |
| 200803170    | Madagascar\$Manjakandriana           | Mar-08 JF311385.1    | bovine   | Medium |
| 200803168    | Madagascar\$Miarinarivo              | 1-Feb-08 JF311383.1  | bovine   | Medium |
| 200803162    | Madagascar\$Taolagnaro               | 1-Jan-08 JF311377.1  | human    | Medium |
| 211977       | Mauritania                           | 5-Dec-10 KF717590.1  | human    | Medium |
| 227595       | Mauritania                           | 2-Nov-12 KF648851.1  | human    | Medium |
| 227598       | Mauritania                           | 2-Nov-12 KF648852.1  | human    | Medium |
| 227601       | Mauritania                           | 2-Nov-12 KF648853.1  | human    | Medium |
| 227602       | Mauritania                           | 2-Nov-12 KF648854.1  | human    | Medium |
| 227603       | Mauritania                           | 2-Nov-12 KF648855.1  | human    | Medium |
| 227608       | Mauritania                           | 2-Nov-12 KF648856.1  | human    | Medium |
| OS1          | Mauritania                           | 1987 DQ380186.1      | human    | Medium |
| OS3          | Mauritania                           | 1987 DQ380184.1      | human    | Medium |

|                   |                           |                      |          |        |
|-------------------|---------------------------|----------------------|----------|--------|
| OS8               | Mauritania                | 1987 DQ380185.1      | human    | Medium |
| OS9               | Mauritania                | 1987 DQ380183.1      | human    | Medium |
| M30ARMcxMRAA1999  | Mauritania\$AyounElAtross | 1999 JN995322.1      | mosquito | Medium |
| M214HMMRGA1987    | Mauritania\$Garack        | 1987 JN995303.1      | human    | Medium |
| M298ARMcxMRGI2003 | Mauritania\$Guimi         | 2003 JN995336.1      | mosquito | Medium |
| M303ARMcxMRGI2003 | Mauritania\$Guimi         | 2003 JN995337.1      | mosquito | Medium |
| M347ARMcxMRGI2003 | Mauritania\$Guimi         | 2003 JN995338.1      | mosquito | Medium |
| M356ARMcxMRGI2003 | Mauritania\$Guimi         | 2003 JN995339.1      | mosquito | Medium |
| M11ANMMRHG1998    | Mauritania\$HodhElGarbi   | 1998 JN995312.1      | sheep    | Medium |
| M16ANMMRHG1998    | Mauritania\$HodhElGarbi   | 1998 JN995313.1      | Unknown  | Medium |
| M22ANMMRHG1998    | Mauritania\$HodhElGarbi   | 1998 JN995314.1      | Unknown  | Medium |
| M24ANMMRHG1998    | Mauritania\$HodhElGarbi   | 1998 JN995315.1      | sheep    | Medium |
| M25ANMMRHG1998    | Mauritania\$HodhElGarbi   | 1998 JN995316.1      | sheep    | Medium |
| M292HMMRHG1998    | Mauritania\$HodhElGarbi   | 1998 JN995344.1      | human    | Medium |
| M208HMMRKM1987    | Mauritania\$KeurMacene    | 1987 JN995300.1      | human    | Medium |
| M226HMMRNK1987    | Mauritania\$Nkick         | 1987 JN995302.1      | human    | Medium |
| M211HMMRRO1987    | Mauritania\$Rosso         | 1987 JN995301.1      | human    | Medium |
| M232HMMRRO1987    | Mauritania\$Rosso         | 1987 JN995305.1      | human    | Medium |
| M209HMMRTG1987    | Mauritania\$Tegmaline     | 1987 JN995345.1      | human    | Medium |
| M223HMMRTE1987    | Mauritania\$Terg          | 1987 JN995304.1      | human    | Medium |
| 2008/00099        | Mayotte                   | 21-Feb-08 HE687303.1 | human    | Medium |
| 2008/00101        | Mayotte                   | 20-Mar-08 HE687306.1 | human    | Medium |
| Saudi200010911    | SaudiArabia               | 2000 DQ380197.1      | human    | Medium |
| M18ANBkSNBA1993   | Senegal\$Barkedji         | 1993 JN995309.1      | sheep    | Medium |
| M31ARBkcxSNBA2002 | Senegal\$Barkedji         | 2002 JN995324.1      | mosquito | Medium |
| M32ARBkcxSNBA2002 | Senegal\$Barkedji         | Jun-05 JN995325.1    | mosquito | Medium |
| M33ARBkcxSNBA2002 | Senegal\$Barkedji         | Jun-05 JN995326.1    | mosquito | Medium |
| M35ARBkcxSNBA2003 | Senegal\$Barkedji         | 2003 JN995340.1      | mosquito | Medium |
| M36ARBkcxSNBA2003 | Senegal\$Barkedji         | 2003 JN995341.1      | mosquito | Medium |
| M10ARDwxcSNDI1998 | Senegal\$Diawara          | 1998 JN995320.1      | mosquito | Medium |
| M27ARDwxcSNDI1998 | Senegal\$Diawara          | 1998 JN995317.1      | mosquito | Medium |
| M28ARDwxcSNDI1998 | Senegal\$Diawara          | 1998 JN995318.1      | mosquito | Medium |
| M9ARDwxcSNDI1998  | Senegal\$Diawara          | 1998 JN995319.1      | mosquito | Medium |
| M233HMMRRO1987    | Senegal\$Rosso            | 1987 JN995306.1      | human    | Medium |
| 35/74             | SouthAfrica               | 1974 JF784387.1      | sheep    | Medium |
| Kakamas           | SouthAfrica               | Oct-09 JQ068143.1    | sheep    | Medium |
| SA51VanWyck       | SouthAfrica\$Boshof       | 1951 DQ380195.1      | ovine    | Medium |
| SA75              | SouthAfrica\$Randfontein  | 1975 DQ380189.1      | human    | Medium |
| Sudan282010       | Sudan\$GeziraState        | 1-Oct-10 JQ820491.1  | human    | Medium |
| Sudan72010        | Sudan\$GeziraState        | 1-Oct-10 JQ820487.1  | human    | Medium |
| Sudan852010       | Sudan\$GeziraState        | Oct-10 JQ820488.1    | human    | Medium |
| Sudan862010       | Sudan\$GeziraState        | Oct-10 JQ820489.1    | human    | Medium |
| Sudan2V2007       | Sudan\$WhiteNileState     | 29-Jun-05 JQ820490.1 | human    | Medium |
| 2007000323        | Tanzania                  | 1-Feb-07 JF326194.1  | human    | Medium |
| 2007000324        | Tanzania                  | Feb-07 JF326195.1    | human    | Medium |
| TAN/Dod002/07     | Tanzania                  | 14-Mar-07 HM586971.1 | Unknown  | Medium |
| TAN/Tan001/07     | Tanzania                  | 8-Feb-07 HM586970.1  | Unknown  | Medium |
| Entebbe           | Uganda                    | 1944 DQ380191.1      | mosquito | Medium |
| 2250/74           | Zimbabwe\$Beatrice        | 27-May-05 DQ380209.1 | bovine   | Medium |
| 1260/78           | Zimbabwe\$Salisbury       | 1978 DQ380214.1      | bovine   | Medium |
| 2373/74           | Zimbabwe\$Salisbury       | 1974 DQ380194.1      | bovine   | Medium |
| 763/70            | Zimbabwe\$Salisbury       | 1970 DQ380188.1      | bovine   | Medium |
| 1853/78           | Zimbabwe\$Sinoia          | 31-May-05 DQ380220.1 | bovine   | Medium |
| 2269/74           | Zimbabwe\$Sinoia          | 27-May-05 DQ380222.1 | bovine   | Medium |
| ANK3837           | Guinea                    | 3-Jun-05 DQ380165.1  | bat      | Small  |
| ANK6087           | Guinea                    | 6-Jun-05 DQ380166.1  | bat      | Small  |
| 40608             | Madagascar                | Feb-08 GQ443127.1    | bovine   | Small  |
| 41308             | Madagascar                | Feb-08 GQ443128.1    | bovine   | Small  |
| 85508             | 43508 Madagascar          | 22-Feb-08 GQ443131.1 | bovine   | Small  |
|                   | Madagascar                | 24-Mar-08 GQ443152.1 | bovine   | Small  |
|                   | 85608 Madagascar          | 24-Mar-08 GQ443153.1 | bovine   | Small  |
|                   | 85908 Madagascar          | 24-Mar-08 GQ443155.1 | bovine   | Small  |
| 162708            | Madagascar                | 18-Apr-08 GQ443166.1 | bovine   | Small  |
| 173008            | Madagascar                | Apr-08 GQ443168.1    | bovine   | Small  |
| 200803167         | Madagascar\$Antananarivo  | Feb-91 JF311391.1    | bovine   | Small  |
| 200803168         | Madagascar\$Miarinarivo   | 1-Feb-08 JF311392.1  | bovine   | Small  |
| 200803169         | Madagascar\$Antsirabe     | 1-Feb-08 JF311393.1  | bovine   | Small  |
| 2007000080        | Kenya\$Maraguadistrict    | 12-Jan-07 EU574087.1 | bovine   | Small  |
| 2007000094        | Kenya\$Garissadistrict    | 12-Jan-07 EU574086.1 | bovine   | Small  |
| 2007000222        | Kenya\$Maraguadistrict    | 16-Jan-07 EU574085.1 | bovine   | Small  |
| 2007000223        | Kenya\$Maraguadistrict    | 16-Jan-07 EU574084.1 | bovine   | Small  |
| 2007000224        | Kenya\$Maraguadistrict    | 16-Jan-07 EU574083.1 | bovine   | Small  |
| 2007000225        | Kenya\$Maraguadistrict    | 16-Jan-07 EU574082.1 | bovine   | Small  |
| 2007000608        | Kenya\$MeruSouthdistrict  | 29-Jan-07 EU574079.1 | bovine   | Small  |
| 2007000611        | Kenya\$MeruSouthdistrict  | 29-Jan-07 EU574078.1 | bovine   | Small  |
| 2007000618        | Kenya\$MeruSouthdistrict  | 29-Jan-07 EU574077.1 | bovine   | Small  |
| 2007001107        | Kenya\$Thikadistrict      | 25-Jan-07 EU574075.1 | bovine   | Small  |
| 2007001292        | Kenya\$MeruSouthdistrict  | 31-Jan-07 EU574074.1 | bovine   | Small  |
| 2007001443        | Kenya\$Nakurudistrict     | 31-Jan-07 EU574073.1 | bovine   | Small  |
| 2007001564        | Kenya\$Murangadistrict    | 29-Jan-07 EU574072.1 | bovine   | Small  |
| 2007001602        | Kenya\$Mombassadistrict   | 30-Jan-07 EU574071.1 | bovine   | Small  |

|                |                          |           |            |         |       |
|----------------|--------------------------|-----------|------------|---------|-------|
| 2007002060     | Kenya\$Nairobi           | 31-Jan-07 | EU574066.1 | bovine  | Small |
| 2007002444     | Kenya\$MeruCentral       | 5-Feb-07  | EU574065.1 | bovine  | Small |
| 2007002445     | Kenya\$MeruCentral       | 5-Feb-07  | EU574064.1 | bovine  | Small |
| 2007002476     | Kenya\$Nakuru            | 21-Feb-07 | EU574063.1 | bovine  | Small |
| 2007002482     | Kenya\$Thika             | 21-Feb-07 | EU574062.1 | bovine  | Small |
| 2007003081     | Kenya\$Mbeere            | 27-Feb-07 | EU574060.1 | bovine  | Small |
| 2007004193     | Kenya\$Nairobi           | 23-Apr-07 | EU574058.1 | bovine  | Small |
| 2007004194     | Kenya\$Kiambu            | 14-May-07 | EU574057.1 | bovine  | Small |
| 1260/78        | Zimbabwe\$Salisbury      | 1978      | DQ380164.1 | bovine  | Small |
| 1853/78        | Zimbabwe\$Sinoia         | 31-May-05 | DQ380168.1 | bovine  | Small |
| 2250/74        | Zimbabwe\$Beatrice       | 27-May-05 | DQ380143.1 | bovine  | Small |
| 2269/74        | Zimbabwe\$Sinoia         | 27-May-05 | DQ380173.1 | bovine  | Small |
| 2373/74        | Zimbabwe\$Salisbury      | 1974      | DQ380159.1 | bovine  | Small |
| 763/70         | Zimbabwe\$Salisbury      | 1970      | DQ380174.1 | bovine  | Small |
| ZC3349         | Egypt\$Asyut             | 31-May-05 | DQ380152.1 | bovine  | Small |
| 158508         | Madagascar               | Apr-08    | GQ443164.1 | caprine | Small |
| 2007001809     | Kenya\$Garissa           | 1-Dec-06  | EU574069.1 | caprine | Small |
| 2007001811     | Kenya\$Garissa           | 1-Dec-06  | EU574068.1 | caprine | Small |
| 21208          | Madagascar               | 30-Jan-08 | GQ443126.1 | human   | Small |
| 42708          | Madagascar               | Feb-08    | GQ443129.1 | human   | Small |
| 42808          | Madagascar               | 15-Feb-08 | GQ443130.1 | human   | Small |
| 44808          | Madagascar               | 26-Feb-08 | GQ443133.1 | human   | Small |
|                | 44908                    | 26-Feb-08 | GQ443134.1 | human   | Small |
| 61908          | Madagascar               | Mar-08    | GQ443135.1 | human   | Small |
| 68208          | Madagascar               | 12-Mar-08 | GQ443136.1 | human   | Small |
| 68308          | Madagascar               | 12-Mar-08 | GQ443137.1 | human   | Small |
| 68408          | Madagascar               | 12-Mar-08 | GQ443138.1 | human   | Small |
| 69308          | Madagascar               | Mar-08    | GQ443139.1 | human   | Small |
| 77608          | Madagascar               | 14-Mar-08 | GQ443140.1 | human   | Small |
|                | 77908                    | 16-Mar-08 | GQ443141.1 | human   | Small |
| 84508          | Madagascar               | 23-Mar-08 | GQ443142.1 | human   | Small |
| 84608          | Madagascar               | 23-Mar-08 | GQ443143.1 | human   | Small |
| 84708          | Madagascar               | 23-Mar-08 | GQ443144.1 | human   | Small |
| 84808          | Madagascar               | 23-Mar-08 | GQ443145.1 | human   | Small |
| 84908          | Madagascar               | 23-Mar-08 | GQ443146.1 | human   | Small |
| 85008          | Madagascar               | Mar-08    | GQ443147.1 | human   | Small |
| 85108          | Madagascar               | 23-Mar-08 | GQ443148.1 | human   | Small |
| 85208          | Madagascar               | 23-Mar-08 | GQ443149.1 | human   | Small |
| 85308          | Madagascar               | 23-Mar-08 | GQ443150.1 | human   | Small |
| 85408          | Madagascar               | 23-Mar-08 | GQ443151.1 | human   | Small |
| 86308          | Madagascar               | 25-Mar-08 | GQ443156.1 | human   | Small |
| 87808          | Madagascar               | 26-Mar-08 | GQ443157.1 | human   | Small |
| 87908          | Madagascar               | 26-Mar-08 | GQ443158.1 | human   | Small |
| 88908          | Madagascar               | 26-Mar-08 | GQ443159.1 | human   | Small |
| 89208          | Madagascar               | 26-Mar-08 | GQ443160.1 | human   | Small |
| 89508          | Madagascar               | 26-Mar-08 | GQ443161.1 | human   | Small |
| 89708          | Madagascar               | 26-Mar-08 | GQ443162.1 | human   | Small |
| 146408         | Madagascar               | Mar-08    | GQ443163.1 | human   | Small |
| 158608         | Madagascar               | Apr-08    | GQ443165.1 | human   | Small |
| 203208         | Madagascar               | 25-Apr-08 | GQ443169.1 | human   | Small |
| 203308         | Madagascar               | 29-Apr-08 | GQ443170.1 | human   | Small |
| 203408         | Madagascar               | 23-Apr-08 | GQ443171.1 | human   | Small |
| 211977         | Mauritania               | 5-Dec-10  | KF717593.1 | human   | Small |
| 227595         | Mauritania               | 2-Nov-12  | KF648857.1 | human   | Small |
| 227598         | Mauritania               | 2-Nov-12  | KF648858.1 | human   | Small |
| 227601         | Mauritania               | 2-Nov-12  | KF648859.1 | human   | Small |
| 227602         | Mauritania               | 2-Nov-12  | KF648860.1 | human   | Small |
| 227603         | Mauritania               | 2-Nov-12  | KF648861.1 | human   | Small |
| 227608         | Mauritania               | 2-Nov-12  | KF648862.1 | human   | Small |
| 200803162      | Madagascar\$Taolagnaro   | 1-Jan-08  | JF311386.1 | human   | Small |
| 200803164      | Madagascar\$Ankazobe     | 1-Mar-08  | JF311388.1 | human   | Small |
| 200803166      | Madagascar\$Antananarivo | Feb-91    | JF311390.1 | human   | Small |
| 2007000234     | Kenya                    | 29-Jun-05 | JF326198.1 | human   | Small |
| 2007000323     | Tanzania                 | 1-Feb-07  | JF326203.1 | human   | Small |
| 2008/00099     | Mayotte                  | 21-Feb-08 | HE687302.1 | human   | Small |
| 2008/00101     | Mayotte                  | 20-Mar-08 | HE687307.1 | human   | Small |
| 73HB1230       | CentralAfricanRepublic   | 1973      | DQ380172.1 | human   | Small |
| 73HB1449       | CentralAfricanRepublic   | 1973      | DQ380162.1 | human   | Small |
| 74HB59         | CentralAfricanRepublic   | 1974      | DQ380163.1 | human   | Small |
| CARR1622       | CentralAfricanRepublic   | 7-Jun-05  | DQ380160.1 | human   | Small |
| HvB375         | CentralAfricanRepublic   | 7-Jun-05  | DQ380161.1 | human   | Small |
| Kenya9800523   | Kenya                    | 1998      | DQ380169.1 | human   | Small |
| MgH824         | Madagascar               | 1-Jun-05  | DQ380144.1 | human   | Small |
| OS1            | Mauritania               | 1987      | DQ380180.1 | human   | Small |
| OS3            | Mauritania               | 1987      | DQ380178.1 | human   | Small |
| OS8            | Mauritania               | 1987      | DQ380177.1 | human   | Small |
| OS9            | Mauritania               | 1987      | DQ380179.1 | human   | Small |
| S208HMMRKM1987 | Mauritania\$KeurMacene   | 1987      | JN995252.1 | human   | Small |
| S209HMMRTG1987 | Mauritania\$Tegmaline    | 1987      | JN995298.1 | human   | Small |
| S211HMMRRO1987 | Mauritania\$Rosso        | 1987      | JN995253.1 | human   | Small |
| S214HMMRGA1987 | Mauritania\$Garack       | 1987      | JN995255.1 | human   | Small |



|                   |                                      |                      |          |       |
|-------------------|--------------------------------------|----------------------|----------|-------|
| S223HMMRTE1987    | Mauritania\$Terg                     | 1987 JN995256.1      | human    | Small |
| S226HMMRNK1987    | Mauritania\$NkicK                    | 1987 JN995254.1      | human    | Small |
| S232HMMRRO1987    | Mauritania\$Rosso                    | 1987 JN995257.1      | human    | Small |
| S233HMMRRO1987    | Mauritania\$Rosso                    | 1987 JN995258.1      | human    | Small |
| S292HMMRHG1998    | Mauritania\$HodhElGarbi              | 1998 JN995297.1      | human    | Small |
| SA75              | SouthAfrica\$Randfontein             | 1975 DQ380175.1      | human    | Small |
| Saudi200010911    | SaudiArabia                          | 2000 DQ380170.1      | human    | Small |
| Sudan282010       | Sudan\$GeziraState                   | 1-Oct-10 JQ820474.1  | human    | Small |
| Sudan2V2007       | Sudan\$WhiteNileState                | 29-Jun-05 JQ820472.1 | human    | Small |
| Sudan72010        | Sudan\$GeziraState                   | 1-Oct-10 JQ820480.1  | human    | Small |
| Sudan852010       | Sudan\$GeziraState                   | 1-Oct-10 JQ820476.1  | human    | Small |
| Sudan862010       | Sudan\$GeziraState                   | Oct-10 JQ820477.1    | human    | Small |
| ZH1776            | Egypt\$Gharbiya                      | 31-May-05 DQ380153.1 | human    | Small |
| ZH501             | Egypt                                | 30-May-05 GU372973.1 | human    | Small |
| ZH548             | Egypt\$Sharqiya                      | 30-May-05 DQ380151.1 | human    | Small |
| 2007000253        | Kenya                                | 29-Dec-06 JF326201.1 | mosquito | Small |
| ARD38388          | BurkinaFaso                          | 1983 DQ380181.1      | mosquito | Small |
| Entebbe           | Uganda                               | 1944 DQ380156.1      | mosquito | Small |
| F1148             | Madagascar\$AntanifotsyFianarantsoal | Dec-08 GU135843.1    | mosquito | Small |
| FI28              | Madagascar\$AmpandrambatoSahambavy   | Dec-08 GU135841.1    | mosquito | Small |
| Kenya8321445      | Kenya                                | 1983 DQ380171.1      | mosquito | Small |
| S10ARDwxcSNDI1998 | Senegal\$Diawara                     | 1998 JN995272.1      | mosquito | Small |
| S27ARDwxcSNDI1998 | Senegal\$Diawara                     | 1998 JN995269.1      | mosquito | Small |
| S28ARDwxcSNDI1998 | Senegal\$Diawara                     | 1998 JN995270.1      | mosquito | Small |
| S298ARMcxMRGI2003 | Mauritania\$Guimi                    | 2003 JN995289.1      | mosquito | Small |
| S303ARMcxMRGI2003 | Mauritania\$Guimi                    | 2003 JN995290.1      | mosquito | Small |
| S30ARMcxMRAA1999  | Mauritania\$AyounElAtrouss           | 1999 JN995275.1      | mosquito | Small |
| S31ARBkcxSNBA2002 | Senegal\$Barkedji                    | Jun-05 JN995277.1    | mosquito | Small |
| S32ARBkcxSNBA2002 | Senegal\$Barkedji                    | 2002 JN995278.1      | mosquito | Small |
| S33ARBkcxSNBA2002 | Senegal\$Barkedji                    | Jun-05 JN995279.1    | mosquito | Small |
| S347ARMcxMRGI2003 | Mauritania\$Guimi                    | 2003 JN995291.1      | mosquito | Small |
| S356ARMcxMRGI2003 | Mauritania\$Guimi                    | 2003 JN995292.1      | mosquito | Small |
| S35ARBkcxSNBA2003 | Senegal\$Barkedji                    | 2003 JN995293.1      | mosquito | Small |
| S36ARBkcxSNBA2003 | Senegal\$Barkedji                    | 2003 JN995294.1      | mosquito | Small |
| S9ARDwxcSNDI1998  | Senegal\$Diawara                     | 1998 JN995271.1      | mosquito | Small |
| Zinga             | CentralAfricanRepublic               | 1969 DQ380167.1      | mosquito | Small |
| ZM657             | Egypt\$Sharqiya                      | 31-May-05 DQ380146.1 | mosquito | Small |
| 169508            | Madagascar                           | Apr-08 GQ443167.1    | ovine    | Small |
| 2007000473        | Kenya\$Kajaidodistrict               | 26-Jan-07 EU574080.1 | ovine    | Small |
| 2007003644        | Kenya\$Baringodistrict               | 7-Feb-07 EU574059.1  | ovine    | Small |
| Kenya57Rintoul    | Kenya                                | 1951 DQ380155.1      | ovine    | Small |
| SA51VanWyck       | SouthAfrica\$Boshof                  | 1951 DQ380158.1      | ovine    | Small |
| 35/74             | SouthAfrica                          | 1974 JF784388.1      | sheep    | Small |
| Kakamas           | SouthAfrica                          | Oct-09 JQ068142.1    | sheep    | Small |
| S11ANMMRHG1998    | Mauritania\$HodhElGarbi              | 1998 JN995264.1      | sheep    | Small |
| S18ANBkSNBA1993   | Senegal\$Barkedji                    | 1993 JN995261.1      | sheep    | Small |
| S24ANMMRHG1998    | Mauritania\$HodhElGarbi              | 1998 JN995267.1      | sheep    | Small |
| S25ANMMRHG1998    | Mauritania\$HodhElGarbi              | 1998 JN995268.1      | sheep    | Small |
| ZS6365            | Egypt\$Gharbiya                      | 1-Jun-05 DQ380145.1  | sheep    | Small |
| KEN/Bar032/07     | Kenya                                | 3-Feb-07 HM586979.1  | Unknown  | Small |
| KEN/Bar035/07     | Kenya                                | 30-Jan-07 HM586980.1 | Unknown  | Small |
| KEN/Gar004/06     | Kenya                                | 21-Dec-06 HM586975.1 | Unknown  | Small |
| KEN/Gar008/06     | Kenya                                | 21-Dec-06 HM586976.1 | Unknown  | Small |
| KEN/Kil006/07     | Kenya                                | 5-Jan-07 HM586977.1  | Unknown  | Small |
| KEN/Mal032/07     | Kenya                                | 15-Jan-07 HM586978.1 | Unknown  | Small |
| MP12              | Egypt                                | 1977 DQ380154.1      | Unknown  | Small |
| S16ANMMRHG1998    | Mauritania\$HodhElGarbi              | 1998 JN995265.1      | Unknown  | Small |
| S22ANMMRHG1998    | Mauritania\$HodhElGarbi              | 1998 JN995266.1      | Unknown  | Small |
| Smithburn         | Uganda                               | 1944 DQ380157.1      | Unknown  | Small |
| TAN/Dod002/07     | Tanzania                             | 14-Mar-07 HM586982.1 | Unknown  | Small |
| TAN/Tan001/07     | Tanzania                             | 8-Feb-07 HM586981.1  | Unknown  | Small |
